# Supplementary material
Source: PubMed Central journal article supplement (PMC8609605)

Disclosure Purpose: 21-16298

Summary of Interests

**Company or Organization**

| Entity                                                                                                                                                              | Type             | Interest Held By                                                                                                  |
|---------------------------------------------------------------------------------------------------------------------------------------------------------------------|------------------|-------------------------------------------------------------------------------------------------------------------|
| <a href="#">American Academy of Pediatrics</a>                                                                                                                      | Grant / Contract | Self                                                                                                              |
| <i>Recipient Name:</i> Elizabeth Barnett<br><i>Grant / Contract Description:</i> Associate Editor, Red Book<br><i>Additional Information:</i>                       |                  | <i>Recipient Type:</i> Individual<br><i>Grant / Contract Purpose:</i> Other - editing                             |
| <a href="#">Pfizer Inc.</a>                                                                                                                                         | Grant / Contract | Self                                                                                                              |
| <i>Recipient Name:</i> Boston Medical Center<br><i>Grant / Contract Description:</i> RSV vaccine for pregnant women study PCV20 vaccine study COVID vaccine studies |                  | <i>Recipient Type:</i> Institution<br><i>Grant / Contract Purpose:</i> Research<br><i>Additional Information:</i> |

Additional Questions:

- Are there other relationships or activities that readers could perceive to have influenced, or that give the appearance of potentially influencing, what you wrote in the submitted work?**  
No.
- What is the manuscript title?**  
Safety and Immunogenicity of BNT162b2 COVID-19 Vaccine in 5-11 Year Olds
- Are you the corresponding author?**  
No.

Certification

I certify that the information provided in this disclosure is complete and accurate.

**Disclosure Purpose:** 21-16298

## Summary of Interests

| Company or Organization                                            |            |                                                                               |
|--------------------------------------------------------------------|------------|-------------------------------------------------------------------------------|
| Entity                                                             | Type       | Interest Held By                                                              |
| Pfizer, Inc                                                        | Employment | Self                                                                          |
| <i>Title:</i> Associate Director<br><i>Additional Information:</i> |            | <i>Position Description:</i> Head of OPA and SARS-CoV-2 Neutralization Assays |

## Additional Questions:

- Are there other relationships or activities that readers could perceive to have influenced, or that give the appearance of potentially influencing, what you wrote in the submitted work?**  
No.
- What is the manuscript title?**  
Safety and Immunogenicity of BNT162b2 COVID-19 Vaccine in 5-11 Year Olds
- Are you the corresponding author?**  
No.

## Certification

I certify that the information provided in this disclosure is complete and accurate.

Disclosure Purpose: 21-16298

Summary of Interests

**Company or Organization**

| Entity                                                             | Type         | Interest Held By                                |
|--------------------------------------------------------------------|--------------|-------------------------------------------------|
| Pfizer                                                             | Employment   | Self                                            |
| <i>Title:</i> Executive Director<br><i>Additional Information:</i> |              | <i>Position Description:</i> Vaccine Researcher |
| Pfizer                                                             | Stock        | Self                                            |
| <i>Additional Information:</i>                                     |              |                                                 |
| Pfizer                                                             | Stock Option | Self                                            |
| <i>Additional Information:</i>                                     |              |                                                 |

Additional Questions:

- Are there other relationships or activities that readers could perceive to have influenced, or that give the appearance of potentially influencing, what you wrote in the submitted work?**  
No.
- What is the manuscript title?**  
Safety and Immunogenicity of BNT162b2 COVID-19 Vaccine in 5-11 Year Olds
- Are you the corresponding author?**  
No.

Certification

I certify that the information provided in this disclosure is complete and accurate.

Disclosure Purpose: 21-16298

Summary of Interests

**Company or Organization**

| Entity                           | Type       | Interest Held By                                                                                                                                                                                    |
|----------------------------------|------------|-----------------------------------------------------------------------------------------------------------------------------------------------------------------------------------------------------|
| Pfizer Limited                   | Employment | Self                                                                                                                                                                                                |
| <i>Title:</i> Clinical Scientist |            | <i>Position Description:</i> Responsible for bringing together clinical, scientific and technical disciplines to ensure high quality protocol development, study execution and data interpretation. |
| <i>Additional Information:</i>   |            |                                                                                                                                                                                                     |

Additional Questions:

- Are there other relationships or activities that readers could perceive to have influenced, or that give the appearance of potentially influencing, what you wrote in the submitted work?**  
No.
- What is the manuscript title?**  
Safety, Immunogenicity and Efficacy of the BNT162b2 COVID-19 Vaccine in 5-11 Year Olds
- Are you the corresponding author?**  
No.

Certification

I certify that the information provided in this disclosure is complete and accurate.

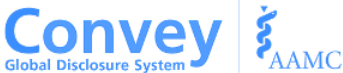

**Disclosure Purpose:** 21-16298

## Summary of Interests

| Company or Organization                                                                                                                                           |       |                                                          |
|-------------------------------------------------------------------------------------------------------------------------------------------------------------------|-------|----------------------------------------------------------|
| Entity                                                                                                                                                            | Type  | Interest Held By                                         |
| <a href="#">Pfizer International LLC</a>                                                                                                                          | Other | Self                                                     |
| <i>Category:</i> Other<br><i>Additional Information:</i> Payments made to my employer, SUNY Upstate Medical University on my behalf for clinical trial activities |       | <i>Description:</i> Site investigator for clinical trial |

## Additional Questions:

- Are there other relationships or activities that readers could perceive to have influenced, or that give the appearance of potentially influencing, what you wrote in the submitted work?**  
No.
- What is the manuscript title?**  
"Safety, Immunogenicity and Efficacy of the BNT162b2 COVID-19 Vaccine in 5-11 Year Olds,"
- Are you the corresponding author?**  
No.

## Certification

I certify that the information provided in this disclosure is complete and accurate.

Disclosure Purpose: 21-16298

Summary of Interests

**Company or Organization**

| Entity                                                                                                             | Type         | Interest Held By             |
|--------------------------------------------------------------------------------------------------------------------|--------------|------------------------------|
| Pfizer                                                                                                             | Employment   | Self                         |
| <i>Title:</i> Vice President and Chief Scientific Officer Viral and RNA Vaccines<br><i>Additional Information:</i> |              | <i>Position Description:</i> |
| Pfizer                                                                                                             | Stock Option | Self                         |
| <i>Additional Information:</i>                                                                                     |              |                              |

Additional Questions:

- Are there other relationships or activities that readers could perceive to have influenced, or that give the appearance of potentially influencing, what you wrote in the submitted work?**  
No.
- What is the manuscript title?**  
Safety and Immunogenicity of BNT162b2 COVID-19 Vaccine in 5-11 Year Olds
- Are you the corresponding author?**  
No.

Certification

I certify that the information provided in this disclosure is complete and accurate.

Disclosure Purpose: 21-16298

Summary of Interests

**Company or Organization**

| Entity | Type             | Interest Held By |
|--------|------------------|------------------|
| Pfizer | Grant / Contract | Self             |

*Recipient Name:* Cincinnati Children's Hospital Medical Center  
*Grant / Contract Description:* Clinical Trial grant for COVID-19 vaccines  
*Additional Information:*

*Recipient Type:* Institution  
*Grant / Contract Purpose:* Research

Additional Questions:

- Are there other relationships or activities that readers could perceive to have influenced, or that give the appearance of potentially influencing, what you wrote in the submitted work?**  
No.
- What is the manuscript title?**  
Safety and Immunogenicity of BNT162b2 COVID-19 Vaccine in 5-11 Year Olds
- Are you the corresponding author?**  
No.

Certification

I certify that the information provided in this disclosure is complete and accurate.

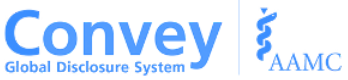

Disclosure Purpose: 21-16298

Summary of Interests

**Company or Organization**

| Entity                              | Type         | Interest Held By                                                                                                  |
|-------------------------------------|--------------|-------------------------------------------------------------------------------------------------------------------|
| Pfizer                              | Employment   | Self                                                                                                              |
| <i>Title:</i> Senior Vice President |              | <i>Position Description:</i> Vaccine Clinical Research and Development Worldwide Research Development and Medical |
| <i>Additional Information:</i>      |              |                                                                                                                   |
| Pfizer                              | Stock        | Self                                                                                                              |
| <i>Additional Information:</i>      |              |                                                                                                                   |
| Pfizer                              | Stock Option | Self                                                                                                              |
| <i>Additional Information:</i>      |              |                                                                                                                   |

Additional Questions:

- Are there other relationships or activities that readers could perceive to have influenced, or that give the appearance of potentially influencing, what you wrote in the submitted work?**  
No.
- What is the manuscript title?**  
Safety and Immunogenicity of BNT162b2 COVID-19 Vaccine in 5-11 Year Olds
- Are you the corresponding author?**  
No.

Certification

I certify that the information provided in this disclosure is complete and accurate.

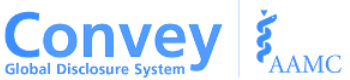



**Disclosure Purpose:** 21-16298

## Summary of Interests

| Company or Organization                                                                      |            |                              |
|----------------------------------------------------------------------------------------------|------------|------------------------------|
| Entity                                                                                       | Type       | Interest Held By             |
| Pfizer                                                                                       | Employment | Self                         |
| <i>Title:</i> VP Vaccine Clinical Research and Development<br><i>Additional Information:</i> |            | <i>Position Description:</i> |

## Additional Questions:

1. **Are there other relationships or activities that readers could perceive to have influenced, or that give the appearance of potentially influencing, what you wrote in the submitted work?**

No.

2. **What is the manuscript title?**

Safety and Immunogenicity of the BNT162b2 COVID-19 Vaccine in 5-11 Year Olds

3. **Are you the corresponding author?**

Yes.

a. **Please list the other authors' names here.**

1. Emmanuel B. Walter, MD (Duke Human Vaccine Institute, Durham, NC, USA)\* 2. Kawsar R. Talaat, MD (Johns Hopkins University, Baltimore, MD, USA)\* 3. Charu Sabharwal, MD, MPH (Vaccine Research and Development, Pfizer Inc, Pearl River, NY, USA) 4. Alejandra Gurtman, MD (Vaccine Research and Development, Pfizer Inc, Pearl River, NY, USA) 5. Stephen Lockhart, DM (Vaccine Research and Development, Pfizer Ltd, Hurley, UK) 6. Grant C. Paulsen, MD (Department of Pediatrics, University of Cincinnati College of Medicine and Division of Pediatric Infectious Diseases, Cincinnati Children's Hospital Medical Center, Cincinnati, OH, USA) 7. Elizabeth D. Barnett, MD (Boston Medical Center, Boston University School of Medicine, Boston, MA, USA) 8. Flor M. Munoz, MD (Texas Children's Hospital, Baylor College of Medicine, Houston, TX, USA) 9. Yvonne Maldonado, MD (Stanford University School of Medicine, Palo Alto, CA, USA) 10. Barbara A. Pahud, MD, MPH (Children's Mercy Hospital, Kansas City, MO, USA)† 11. Joseph B. Domachowske, MD (SUNY Upstate Medical University, Syracuse, NY, USA) 12. Uzma N. Sarwar, MD (Vaccine Research and Development, Pfizer Inc, Pearl River, NY, USA) 13. Nicholas Kitchin, MD (Vaccine Research and Development, Pfizer Ltd, Hurley, UK) 14. Luke Cunliffe, BSc (Vaccine Research and Development, Pfizer Ltd, Hurley, UK) 15. Pablo Rojo, MD (Hospital Universitario 12 de Octubre, Madrid, Spain) 16. Ernest Kuchar, MD, PhD (Medical University of Warsaw, Warsaw, Poland) 17. Mika Rämetsä, MD, PhD (Tampere University Vaccine Research Center, Tampere, Finland, and PEDEGO Research Unit, University of Oulu, Oulu, Finland) 18. Iona Munjal, MD (Vaccine Research and Development, Pfizer Inc, Pearl River, NY, USA) 19. John L. Perez, MD, MBA, MA (Vaccine Research and Development, Pfizer Inc, Collegeville, PA, USA) 20. Robert W. Frenck, Jr., MD (Department of Pediatrics, University of Cincinnati College of Medicine and Division of Pediatric Infectious Diseases, Cincinnati Children's Hospital Medical Center, Cincinnati, OH, USA)

## Certification

I certify that the information provided in this disclosure is complete and accurate.

Disclosure Purpose: 21-16298

Summary of Interests

**Company or Organization**

| Entity                                                                                 | Type       | Interest Held By                                 |
|----------------------------------------------------------------------------------------|------------|--------------------------------------------------|
| Pfizer                                                                                 | Employment | Self                                             |
| <i>Title:</i> SVP and Head of vaccine R&D<br><i>Additional Information:</i>            |            | <i>Position Description:</i> head of vaccine R&D |
| Pfizer                                                                                 | Stock      | Self                                             |
| <i>Additional Information:</i> as a Pfizer employee i hold PFE stock and stock options |            |                                                  |

Additional Questions:

- Are there other relationships or activities that readers could perceive to have influenced, or that give the appearance of potentially influencing, what you wrote in the submitted work?**  
No.
- What is the manuscript title?**  
Safety and Immunogenicity of BNT162b2 COVID-19 Vaccine in 5-11 Year Olds
- Are you the corresponding author?**  
No.

Certification

I certify that the information provided in this disclosure is complete and accurate.

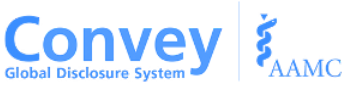

**Disclosure Purpose:** 21-16298

## Summary of Interests

| Company or Organization                                                               |              |                                                                        |
|---------------------------------------------------------------------------------------|--------------|------------------------------------------------------------------------|
| Entity                                                                                | Type         | Interest Held By                                                       |
| Pfizer                                                                                | Employment   | Self                                                                   |
| <i>Title:</i> Executive Director<br><i>Additional Information:</i> Full time employee |              | <i>Position Description:</i> Vaccine Clinical Research and Development |
| Pfizer                                                                                | Stock        | Self                                                                   |
| <i>Additional Information:</i>                                                        |              |                                                                        |
| Pfizer                                                                                | Stock Option | Self                                                                   |
| <i>Additional Information:</i>                                                        |              |                                                                        |

## Additional Questions:

- Are there other relationships or activities that readers could perceive to have influenced, or that give the appearance of potentially influencing, what you wrote in the submitted work?**  
No.
- What is the manuscript title?**  
Safety and Immunogenicity of BNT162b2 COVID-19 Vaccine in 5-11 Year Olds
- Are you the corresponding author?**  
No.

## Certification

I certify that the information provided in this disclosure is complete and accurate.

**Disclosure Purpose:** 21-16298

## Summary of Interests

| Company or Organization                                            |            |                                                                                                         |
|--------------------------------------------------------------------|------------|---------------------------------------------------------------------------------------------------------|
| Entity                                                             | Type       | Interest Held By                                                                                        |
| Pfizer                                                             | Employment | Self                                                                                                    |
| <i>Title:</i> Executive Director<br><i>Additional Information:</i> |            | <i>Position Description:</i> Head of Statistics and Modeling, Vaccine Clinical Research and Development |
| Pfizer                                                             | Stock      | Self                                                                                                    |
| <i>Additional Information:</i>                                     |            |                                                                                                         |

## Additional Questions:

- Are there other relationships or activities that readers could perceive to have influenced, or that give the appearance of potentially influencing, what you wrote in the submitted work?**  
No.
- What is the manuscript title?**  
Safety and Immunogenicity of BNT162b2 COVID-19 Vaccine in 5-11 Year Olds
- Are you the corresponding author?**  
No.

## Certification

I certify that the information provided in this disclosure is complete and accurate.

**Disclosure Purpose:** 21-16298

**Summary of Interests**

I do not have any interests to disclose at this time.

**Additional Questions:**

- 1. **Are there other relationships or activities that readers could perceive to have influenced, or that give the appearance of potentially influencing, what you wrote in the submitted work?**  
No.
- 2. **What is the manuscript title?**  
Safety and Immunogenicity of BNT162b2 COVID-19 Vaccine in 5-11-Year-Olds
- 3. **Are you the corresponding author?**  
No.

**Certification**

I certify that the information provided in this disclosure is complete and accurate.

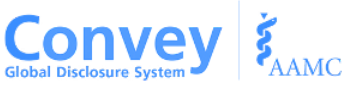

Disclosure Purpose: 21-16298

Summary of Interests

**Company or Organization**

| Entity                                                                           | Type       | Interest Held By             |
|----------------------------------------------------------------------------------|------------|------------------------------|
| BioNTech SE                                                                      | Employment | Self                         |
| <i>Title:</i> Vice President Clinical Research<br><i>Additional Information:</i> |            | <i>Position Description:</i> |

Additional Questions:

- Are there other relationships or activities that readers could perceive to have influenced, or that give the appearance of potentially influencing, what you wrote in the submitted work?**  
No.
- What is the manuscript title?**  
Safety and Immunogenicity of BNT162b2 COVID-19 Vaccine in 5-11 Year Olds
- Are you the corresponding author?**  
No.

Certification

I certify that the information provided in this disclosure is complete and accurate.

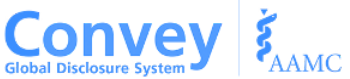

Disclosure Purpose: 21-16298

Summary of Interests

| Company or Organization                                        |              |                                                                                      |
|----------------------------------------------------------------|--------------|--------------------------------------------------------------------------------------|
| Entity                                                         | Type         | Interest Held By                                                                     |
| Pfizer                                                         | Employment   | Self                                                                                 |
| <i>Title:</i> Vice President<br><i>Additional Information:</i> |              | <i>Position Description:</i> Clinical Research Head Vaccines Europe and Asia Pacific |
| Pfizer                                                         | Stock        | Self                                                                                 |
| <i>Additional Information:</i>                                 |              |                                                                                      |
| Pfizer                                                         | Stock Option | Self                                                                                 |
| <i>Additional Information:</i>                                 |              |                                                                                      |

Additional Questions:

- Are there other relationships or activities that readers could perceive to have influenced, or that give the appearance of potentially influencing, what you wrote in the submitted work?  
No.
- What is the manuscript title?  
Safety and Immunogenicity of BNT162b2 COVID-19 Vaccine in 5-11 Year Olds
- Are you the corresponding author?  
No.

Certification

I certify that the information provided in this disclosure is complete and accurate.

Disclosure Purpose: 21-16298

Summary of Interests

**Company or Organization**

| Entity                                                                        | Type       | Interest Held By                                         |
|-------------------------------------------------------------------------------|------------|----------------------------------------------------------|
| Pfizer                                                                        | Employment | Self                                                     |
| <i>Title:</i> Senior Manager, Biostatistics<br><i>Additional Information:</i> |            | <i>Position Description:</i> Clinical trial statistician |
| Pfizer                                                                        | Stock      | Self                                                     |
| <i>Additional Information:</i>                                                |            |                                                          |

Additional Questions:

- Are there other relationships or activities that readers could perceive to have influenced, or that give the appearance of potentially influencing, what you wrote in the submitted work?**  
No.
- What is the manuscript title?**  
Safety and Immunogenicity of BNT162b2 COVID-19 Vaccine in 5-11 Year Olds
- Are you the corresponding author?**  
No.

Certification

I certify that the information provided in this disclosure is complete and accurate.

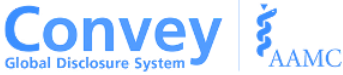



Disclosure Purpose: 21-16298

## Summary of Interests

### Company or Organization

| Entity                                                                                                                                                                                                                                                                      | Type                       | Interest Held By                                                                |
|-----------------------------------------------------------------------------------------------------------------------------------------------------------------------------------------------------------------------------------------------------------------------------|----------------------------|---------------------------------------------------------------------------------|
| Pfizer Inc.                                                                                                                                                                                                                                                                 | Grant / Contract           | Self                                                                            |
| <i>Recipient Name:</i> Stanford University School of Medicine<br><i>Grant / Contract Description:</i> Pfizer Maternal RSV Vaccine Clinical Trial<br><i>Additional Information:</i> Stanford Site Principal Investigator for this vaccine trial                              |                            | <i>Recipient Type:</i> Institution<br><i>Grant / Contract Purpose:</i> Research |
| Pfizer Inc.                                                                                                                                                                                                                                                                 | Grant / Contract           | Self                                                                            |
| <i>Recipient Name:</i> Stanford University School of Medicine<br><i>Grant / Contract Description:</i> Pfizer Pediatric COVID-19 Vaccine Clinical Trials<br><i>Additional Information:</i> Stanford Site Principal Investigator for Pfizer Pediatric Vaccine Clinical Trials |                            | <i>Recipient Type:</i> Institution<br><i>Grant / Contract Purpose:</i> Research |
| Pfizer Inc.                                                                                                                                                                                                                                                                 | Data And Safety Monitoring | Self                                                                            |
| <i>Category:</i> Data And Safety Monitoring<br><i>Additional Information:</i>                                                                                                                                                                                               |                            | <i>Description:</i> Member, DSMB, Pfizer Meningococcal Vaccines Clinical Trials |

### Additional Questions:

- Are there other relationships or activities that readers could perceive to have influenced, or that give the appearance of potentially influencing, what you wrote in the submitted work?**

No.
- What is the manuscript title?**

Safety, Immunogenicity and Efficacy of the BNT162b2 COVID-19 Vaccine in 5-11 Year Olds
- Are you the corresponding author?**

No.

### Certification

I certify that the information provided in this disclosure is complete and accurate.

Disclosure Purpose: 21-16298

Summary of Interests

**Company or Organization**

| Entity                                                            | Type       | Interest Held By                                                                        |
|-------------------------------------------------------------------|------------|-----------------------------------------------------------------------------------------|
| Pfizer Inc.                                                       | Employment | Self                                                                                    |
| <i>Title:</i> Director, Vaccine Clinical Research and Development |            | <i>Position Description:</i> Medical Monitor overseeing ongoing vaccine clinical trials |
| <i>Additional Information:</i>                                    |            |                                                                                         |
| Pfizer Inc.                                                       | Stock      | Self                                                                                    |
| <i>Additional Information:</i>                                    |            |                                                                                         |

Additional Questions:

- Are there other relationships or activities that readers could perceive to have influenced, or that give the appearance of potentially influencing, what you wrote in the submitted work?**  
No.
- What is the manuscript title?**  
Safety and Immunogenicity of BNT162b2 COVID-19 Vaccine in 5-11 Year Olds
- Are you the corresponding author?**  
No.

Certification

I certify that the information provided in this disclosure is complete and accurate.

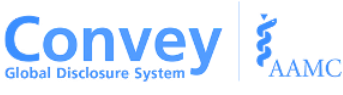

**Disclosure Purpose:** 21-16298

## Summary of Interests

| Company or Organization                                                       |                            |                                      |
|-------------------------------------------------------------------------------|----------------------------|--------------------------------------|
| Entity                                                                        | Type                       | Interest Held By                     |
| <a href="#">Moderna</a>                                                       | Data And Safety Monitoring | Self                                 |
| <i>Category:</i> Data And Safety Monitoring<br><i>Additional Information:</i> |                            | <i>Description:</i> Various vaccines |
| <a href="#">Pfizer Inc.</a>                                                   | Data And Safety Monitoring | Self                                 |
| <i>Category:</i> Data And Safety Monitoring<br><i>Additional Information:</i> |                            | <i>Description:</i> RSV vaccines     |

## Additional Questions:

- Are there other relationships or activities that readers could perceive to have influenced, or that give the appearance of potentially influencing, what you wrote in the submitted work?**  
No.
- What is the manuscript title?**  
Safety and Immunogenicity of BNT162b2 COVID-19 Vaccine in 5-11 Year Olds
- Are you the corresponding author?**  
No.

## Certification

I certify that the information provided in this disclosure is complete and accurate.

Disclosure Purpose: 21-16298

## Summary of Interests

### Company or Organization

| Entity                                                                                                                                                                                          | Type       | Interest Held By                                                                                              |
|-------------------------------------------------------------------------------------------------------------------------------------------------------------------------------------------------|------------|---------------------------------------------------------------------------------------------------------------|
| <a href="#">Merck</a>                                                                                                                                                                           | Consultant | Self                                                                                                          |
| <i>Category:</i> Consultant<br><i>Additional Information:</i> Presented and participated at forum                                                                                               |            | <i>Description:</i> service on US Vaccine Confidence Expert Input Forum                                       |
| <a href="#">Pfizer</a>                                                                                                                                                                          | Consultant | Self                                                                                                          |
| <i>Category:</i> Consultant<br><i>Additional Information:</i> limited time consultant for topic specific story                                                                                  |            | <i>Description:</i> Consultant for Trumenba Science Story                                                     |
| <a href="#">Pfizer</a>                                                                                                                                                                          | Consultant | Self                                                                                                          |
| <i>Category:</i> Consultant<br><i>Additional Information:</i> Time limited consultant for topic specific activity                                                                               |            | <i>Description:</i> Consultant for Pediatric Pneumococcal PEGASUS                                             |
| <a href="#">Pfizer</a>                                                                                                                                                                          | Consultant | Self                                                                                                          |
| <i>Category:</i> Consultant<br><i>Additional Information:</i> Consultant for one time meeting on topic specific discussion                                                                      |            | <i>Description:</i> Consultant for Virtual Discussion about future pediatric PCV recommendations in the US    |
| <a href="#">Pfizer</a>                                                                                                                                                                          | Consultant | Self                                                                                                          |
| <i>Category:</i> Consultant<br><i>Additional Information:</i> Limited time Consultant for topic specific broadcast                                                                              |            | <i>Description:</i> Consultant for Spring 2021 Trumenba Premiere Broadcast                                    |
| <a href="#">SANOFI PASTEUR INC.</a>                                                                                                                                                             | Consultant | Self                                                                                                          |
| <i>Category:</i> Consultant<br><i>Additional Information:</i> Hotel and flight was booked by the funder                                                                                         |            | <i>Description:</i> Presented at the International Forum Voices for Vaccination on 8/29/19 in Mexico City, MX |
| <a href="#">SANOFI PASTEUR INC.</a>                                                                                                                                                             | Consultant | Self                                                                                                          |
| <i>Category:</i> Consultant<br><i>Additional Information:</i> Served as speaker to healthcare professionals on topics specific to vaccines & vaccine hesitancy                                  |            | <i>Description:</i> provided presentations as requested                                                       |
| <a href="#">SANOFI PASTEUR INC.</a>                                                                                                                                                             | Consultant | Self                                                                                                          |
| <i>Category:</i> Consultant<br><i>Additional Information:</i> limited time scientific/vaccine consultant for the production of educational videos to support HCPs in managing vaccine hesitancy |            | <i>Description:</i> Scientific consultant & Medical Expert                                                    |

### Additional Questions:

- Are there other relationships or activities that readers could perceive to have influenced, or that give the appearance of potentially influencing, what you wrote in the submitted work?  
No.
- What is the manuscript title?  
Safety and Immunogenicity of BNT162b2 COVID-19 Vaccine in 5-11 Year Olds
- Are you the corresponding author?  
No.

### Certification

I certify that the information provided in this disclosure is complete and accurate.



Disclosure Purpose: 21-16298

## Summary of Interests

### Company or Organization

| Entity                                                                                                                                                                                                                                                 | Type             | Interest Held By                                                                |
|--------------------------------------------------------------------------------------------------------------------------------------------------------------------------------------------------------------------------------------------------------|------------------|---------------------------------------------------------------------------------|
| <a href="#">PFIZER CANADA INC</a>                                                                                                                                                                                                                      | Grant / Contract | Self                                                                            |
| <i>Recipient Name:</i> Grant Paulsen<br><i>Grant / Contract Description:</i> Grant/Contract support from Pfizer to conduct a clinical vaccine trial.<br><i>Additional Information:</i> Support is ~10% of my time/salary as the Site PI for the trial. |                  | <i>Recipient Type:</i> Institution<br><i>Grant / Contract Purpose:</i> Research |

## Additional Questions:

- Are there other relationships or activities that readers could perceive to have influenced, or that give the appearance of potentially influencing, what you wrote in the submitted work?**  
No.
- What is the manuscript title?**  
Safety and Immunogenicity of BNT162b2 COVID-19 Vaccine in 5-11 Year Olds
- Are you the corresponding author?**  
No.

## Certification

I certify that the information provided in this disclosure is complete and accurate.

Disclosure Purpose: 21-16298

## Summary of Interests

### Company or Organization

| Entity                                                               | Type       | Interest Held By             |
|----------------------------------------------------------------------|------------|------------------------------|
| Pfizer                                                               | Employment | Self                         |
| <i>Title:</i> Vice President Vaccine Clinical Research & Development |            | <i>Position Description:</i> |
| <i>Additional Information:</i>                                       |            |                              |

### Intellectual Property

| Type                                                  | Is Licensed                         | Interest Held By                          |
|-------------------------------------------------------|-------------------------------------|-------------------------------------------|
| Patent - Meningococcal Pentavalent vaccine            | No                                  | Self                                      |
| <i>Description:</i> Meningococcal Pentavalent vaccine | <i>Patent Number:</i> 10,813,989 B2 | <i>Patent Holder:</i> Current Institution |
| <i>Patent Status:</i> Issued                          | <i>Additional Information:</i>      |                                           |
| <i>Filing Jurisdiction:</i> USA                       |                                     |                                           |
| <i>Licensees:</i>                                     |                                     |                                           |

## Additional Questions:

- Are there other relationships or activities that readers could perceive to have influenced, or that give the appearance of potentially influencing, what you wrote in the submitted work?  
No.
- What is the manuscript title?  
Safety and Immunogenicity of BNT162b2 COVID-19 Vaccine in 5-11 Year Olds
- Are you the corresponding author?  
No.

## Certification

I certify that the information provided in this disclosure is complete and accurate.

Disclosure Purpose: 21-16298

## Summary of Interests

## Company or Organization

| Entity                                                                                                                                                                                                                                                                                                                                                                                                                        | Type  | Interest Held By |
|-------------------------------------------------------------------------------------------------------------------------------------------------------------------------------------------------------------------------------------------------------------------------------------------------------------------------------------------------------------------------------------------------------------------------------|-------|------------------|
| <a href="#">GlaxoSmithKline</a>                                                                                                                                                                                                                                                                                                                                                                                               | Other | Self             |
| <p><b>Category:</b> Other<br/> <b>Description:</b> National coordinator and/or PI for clinical trials<br/> <b>Additional Information:</b> National coordinator and/or PI for several clinical vaccine trials sponsored by GSK. However, I am employed by the Tampere University which has made the contract with the sponsor whereas I have not personally received any direct compensation from GSK.</p>                     |       |                  |
| <a href="#">Janssen Biotech</a>                                                                                                                                                                                                                                                                                                                                                                                               | Other | Self             |
| <p><b>Category:</b> Other<br/> <b>Description:</b> National coordinator and/or PI for clinical vaccine trials<br/> <b>Additional Information:</b> National coordinator and/or PI for several clinical vaccine trials sponsored by Janssen. However, I am employed by the Tampere University which has made the contract with the sponsor whereas I have not personally received any direct compensation from Janssen.</p>     |       |                  |
| <a href="#">MedImmune</a>                                                                                                                                                                                                                                                                                                                                                                                                     | Other | Self             |
| <p><b>Category:</b> Other<br/> <b>Description:</b> National coordinator and/or PI for clinical vaccine trials<br/> <b>Additional Information:</b> National coordinator and/or PI for several clinical vaccine trials sponsored by MedImmune. However, I am employed by the Tampere University which has made the contract with the sponsor whereas I have not personally received any direct compensation from MedImmune.</p> |       |                  |
| <a href="#">Merck Sharp and Dohme</a>                                                                                                                                                                                                                                                                                                                                                                                         | Other | Self             |
| <p><b>Category:</b> Other<br/> <b>Description:</b> National coordinator and/or PI for clinical vaccine trials<br/> <b>Additional Information:</b> National coordinator and/or PI for several clinical vaccine trials sponsored by MSD. However, I am employed by the Tampere University which has made the contract with the sponsor whereas I have not personally received any direct compensation from MSD.</p>             |       |                  |
| <a href="#">Pfizer Inc.</a>                                                                                                                                                                                                                                                                                                                                                                                                   | Other | Self             |
| <p><b>Category:</b> Other<br/> <b>Description:</b> Clinical Trial, National coordinator<br/> <b>Additional Information:</b> National coordinator and/or PI for several clinical vaccine trials sponsored by Pfizer. However, I am employed by the Tampere University which has made the contract with the sponsor whereas I have not personally received any direct compensation from Pfizer.</p>                             |       |                  |
| <a href="#">SANOFI PASTEUR INC.</a>                                                                                                                                                                                                                                                                                                                                                                                           | Other | Self             |
| <p><b>Category:</b> Other<br/> <b>Description:</b> National coordinator and/or PI for clinical trials<br/> <b>Additional Information:</b> National coordinator and/or PI for several clinical vaccine trials sponsored by SanofiPasteur. However, I am employed by the Tampere University which has made the contract with the sponsor whereas I have not personally received any direct compensation from SanofiPasteur.</p> |       |                  |

## Additional Questions:

1. Are there other relationships or activities that readers could perceive to have influenced, or that give the appearance of potentially influencing, what you wrote in the submitted work?

Yes.

- a. Please describe those relationships.

I have been the national coordinator in Finland for this study which was sponsored by Pfizer. However, I am employed by the Tampere University which has made the contract with the sponsor whereas I have not personally received any direct compensation from Pfizer.

2. What is the manuscript title?  
Safety and Immunogenicity of BNT162b2 COVID-19 Vaccine in 5-11 Year Olds
3. Are you the corresponding author?

No.

## Certification

I certify that the information provided in this disclosure is complete and accurate.





**Disclosure Purpose:** 21-16298

**Summary of Interests**

I do not have any interests to disclose at this time.

**Additional Questions:**

- 1. **Are there other relationships or activities that readers could perceive to have influenced, or that give the appearance of potentially influencing, what you wrote in the submitted work?**  
No.
- 2. **What is the manuscript title?**  
Safety and Immunogenicity of BNT162b2 COVID-19 Vaccine in 5-11 Year Olds
- 3. **Are you the corresponding author?**  
No.

**Certification**

I certify that the information provided in this disclosure is complete and accurate.



Disclosure Purpose: 21-16298

Summary of Interests

**Company or Organization**

| Entity                         | Type       | Interest Held By                                                                              |
|--------------------------------|------------|-----------------------------------------------------------------------------------------------|
| Pfizer                         | Employment | Self                                                                                          |
| <i>Title:</i> Director         |            | <i>Position Description:</i> Medical Monitor within Vaccine Clinical Research and Development |
| <i>Additional Information:</i> |            |                                                                                               |

Additional Questions:

- Are there other relationships or activities that readers could perceive to have influenced, or that give the appearance of potentially influencing, what you wrote in the submitted work?**  
No.
- What is the manuscript title?**  
Safety and Immunogenicity of BNT162b2 COVID-19 Vaccine in 5-11 Year Olds
- Are you the corresponding author?**  
No.

Certification

I certify that the information provided in this disclosure is complete and accurate.



Disclosure Purpose: 21-16298

Summary of Interests

**Company or Organization**

| Entity                                                     | Type              | Interest Held By                                 |
|------------------------------------------------------------|-------------------|--------------------------------------------------|
| biontech                                                   | Fiduciary Officer | Self                                             |
| <i>Official Title:</i> Chief Executive Officer, Co-Founder |                   | <i>Position Description:</i> Member of the Board |
| <i>Additional Information:</i>                             |                   |                                                  |
| biontech                                                   | Stock             | Self                                             |
| <i>Additional Information:</i>                             |                   |                                                  |
| biontech                                                   | Stock Option      | Self                                             |
| <i>Additional Information:</i>                             |                   |                                                  |

**Intellectual Property**

| Type                                                                                                                                                                     | Is Licensed | Interest Held By                                                                                                                                                                                                                                                 |       |      |          |  |
|--------------------------------------------------------------------------------------------------------------------------------------------------------------------------|-------------|------------------------------------------------------------------------------------------------------------------------------------------------------------------------------------------------------------------------------------------------------------------|-------|------|----------|--|
| Patent - 3 UTR Sequences for stabilisation of mRNA                                                                                                                       | Yes         | Self                                                                                                                                                                                                                                                             |       |      |          |  |
| <i>Description:</i> 3 UTR Sequences for stabilisation of mRNA                                                                                                            |             | <i>Patent Number:</i> EPPCT/EP2015/073180, US 20190071682                                                                                                                                                                                                        |       |      |          |  |
| <i>Patent Status:</i> Pending                                                                                                                                            |             | <i>Patent Holder:</i> Previous Institution                                                                                                                                                                                                                       |       |      |          |  |
| <i>Filing Jurisdiction:</i> USA                                                                                                                                          |             | <i>Additional Information:</i> I am co-inventors on various patents on RNA Technologies, both pending and granted, which have been filed over a period of 10+ years, some of which are licensed to third parties. Jurisdictions ae Broad including US, EU, Asia. |       |      |          |  |
| <i>Licensees:</i>                                                                                                                                                        |             |                                                                                                                                                                                                                                                                  |       |      |          |  |
| <table border="1"> <thead> <tr> <th>Licensee</th> <th>Title</th> <th>Date</th> </tr> </thead> <tbody> <tr> <td>biontech</td> <td></td> <td></td> </tr> </tbody> </table> | Licensee    |                                                                                                                                                                                                                                                                  | Title | Date | biontech |  |
| Licensee                                                                                                                                                                 | Title       | Date                                                                                                                                                                                                                                                             |       |      |          |  |
| biontech                                                                                                                                                                 |             |                                                                                                                                                                                                                                                                  |       |      |          |  |

**Additional Questions:**

- Are there other relationships or activities that readers could perceive to have influenced, or that give the appearance of potentially influencing, what you wrote in the submitted work?  
No.
- What is the manuscript title?  
Evaluation of the BNT162b2 COVID-19 Vaccine in 5-11 Year Olds
- Are you the corresponding author?  
No.

**Certification**

I certify that the information provided in this disclosure is complete and accurate.

Disclosure Purpose: 21-16298

Summary of Interests

**Company or Organization**

| Entity                                                             | Type       | Interest Held By                             |
|--------------------------------------------------------------------|------------|----------------------------------------------|
| Pfizer Inc.                                                        | Employment | Self                                         |
| <i>Title:</i> Associate Director<br><i>Additional Information:</i> |            | <i>Position Description:</i> Medical Monitor |

Additional Questions:

- Are there other relationships or activities that readers could perceive to have influenced, or that give the appearance of potentially influencing, what you wrote in the submitted work?**  
No.
- What is the manuscript title?**  
Safety and Immunogenicity of BNT162b2 COVID-19 Vaccine in 5-11 Year Olds
- Are you the corresponding author?**  
No.

Certification

I certify that the information provided in this disclosure is complete and accurate.

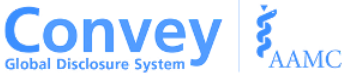

Disclosure Purpose: 21-16298

Summary of Interests

| Company or Organization                                                                                                                                   |                  |                                                                                                                   |
|-----------------------------------------------------------------------------------------------------------------------------------------------------------|------------------|-------------------------------------------------------------------------------------------------------------------|
| Entity                                                                                                                                                    | Type             | Interest Held By                                                                                                  |
| Pfizer Inc.                                                                                                                                               | Grant / Contract | Other - Children's Hospital Colorado and University of Colorado School of Medicine                                |
| <i>Recipient Name:</i> Eric Simoes<br><i>Grant / Contract Description:</i> Grants to conduct trials C4591007, C4591015, C3571002, C3671003, and C3671008, |                  | <i>Recipient Type:</i> Institution<br><i>Grant / Contract Purpose:</i> Research<br><i>Additional Information:</i> |
| Regeneron Pharmaceuticals, Inc.                                                                                                                           | Grant / Contract | Other - University of Colorado School of Medicine and Samshoma Medical Research Inc                               |
| <i>Recipient Name:</i> Eric Simoes<br><i>Grant / Contract Description:</i> R10933-10987-COV-2069 and 0000-COV-CES-2053<br><i>Additional Information:</i>  |                  | <i>Recipient Type:</i> Institution<br><i>Grant / Contract Purpose:</i> Research                                   |

Additional Questions:

- Are there other relationships or activities that readers could perceive to have influenced, or that give the appearance of potentially influencing, what you wrote in the submitted work?  
No.
- What is the manuscript title?  
Evaluation of the BNT162b2 Covid-19 Vaccine in Children 5 to 11 Years of Age
- Are you the corresponding author?  
No.

Certification

I certify that the information provided in this disclosure is complete and accurate.

Disclosure Purpose: 21-16298

Summary of Interests

**Company or Organization**

| Entity                                                                   | Type       | Interest Held By                                              |
|--------------------------------------------------------------------------|------------|---------------------------------------------------------------|
| Pfizer                                                                   | Employment | Self                                                          |
| <i>Title:</i> Director, Viral Vaccines<br><i>Additional Information:</i> |            | <i>Position Description:</i> vaccine research and development |
| Pfizer                                                                   | Stock      | Self                                                          |
| <i>Additional Information:</i>                                           |            |                                                               |

Additional Questions:

- Are there other relationships or activities that readers could perceive to have influenced, or that give the appearance of potentially influencing, what you wrote in the submitted work?**  
No.
- What is the manuscript title?**  
Safety and Immunogenicity of BNT162b2 COVID-19 Vaccine in 5-11 Year Olds
- Are you the corresponding author?**  
No.

Certification

I certify that the information provided in this disclosure is complete and accurate.



Disclosure Purpose: 21-16298

Summary of Interests

| Company or Organization                                                                                                                                                                      |                  |                                                                                                                   |
|----------------------------------------------------------------------------------------------------------------------------------------------------------------------------------------------|------------------|-------------------------------------------------------------------------------------------------------------------|
| Entity                                                                                                                                                                                       | Type             | Interest Held By                                                                                                  |
| Pfizer Inc.                                                                                                                                                                                  | Grant / Contract | Self                                                                                                              |
| <i>Recipient Name:</i> Johns Hopkins University<br><i>Grant / Contract Description:</i> To conduct 3 clinical trials of the Pfizer-BioNTech vaccine in adults and children. I am the PI.     |                  | <i>Recipient Type:</i> Institution<br><i>Grant / Contract Purpose:</i> Research<br><i>Additional Information:</i> |
| SANOFI PASTEUR INC.                                                                                                                                                                          | Grant / Contract | Self                                                                                                              |
| <i>Recipient Name:</i> Johns Hopkins University<br><i>Grant / Contract Description:</i> To conduct a yellow fever vaccine trial; I am the PI of the trial.<br><i>Additional Information:</i> |                  | <i>Recipient Type:</i> Institution<br><i>Grant / Contract Purpose:</i> Research                                   |

Additional Questions:

- Are there other relationships or activities that readers could perceive to have influenced, or that give the appearance of potentially influencing, what you wrote in the submitted work?  
No.
- What is the manuscript title?  
Safety and Immunogenicity of BNT162b2 COVID-19 Vaccine in 5-11 Year olds
- Are you the corresponding author?  
No.

Certification

I certify that the information provided in this disclosure is complete and accurate.





Disclosure Purpose: 21-16298

## Summary of Interests

### Company or Organization

| Entity                                                                                                                                                          | Type              | Interest Held By                                      |
|-----------------------------------------------------------------------------------------------------------------------------------------------------------------|-------------------|-------------------------------------------------------|
| biontech                                                                                                                                                        | Employment        | Self                                                  |
| <i>Title:</i> Chief Medical Officer<br><i>Additional Information:</i> also spouse is board member and CEO of Company since 2008                                 |                   | <i>Position Description:</i> Board member, CO-founder |
| biontech                                                                                                                                                        | Fiduciary Officer | Self                                                  |
| <i>Official Title:</i> Chief Medical Officer<br><i>Additional Information:</i> also spouse is co-founder and board member (Chief Executive Officer) of Biontech |                   | <i>Position Description:</i> board member, co-founder |
| biontech                                                                                                                                                        | Fiduciary Officer | Spouse/Partner                                        |
| <i>Official Title:</i> CEO<br><i>Additional Information:</i>                                                                                                    |                   | <i>Position Description:</i>                          |
| biontech                                                                                                                                                        | Stock             | Spouse/Partner                                        |
| <i>Additional Information:</i> founder, shareholder                                                                                                             |                   |                                                       |
| biontech                                                                                                                                                        | Stock Option      | Self                                                  |
| <i>Additional Information:</i> self and spouse have stock Options. spouse has stock                                                                             |                   |                                                       |

### Intellectual Property

| Type                                                                                                                                                                                                     | Is Licensed | Interest Held By                                                                                                                                                                                       |      |          |  |  |  |  |
|----------------------------------------------------------------------------------------------------------------------------------------------------------------------------------------------------------|-------------|--------------------------------------------------------------------------------------------------------------------------------------------------------------------------------------------------------|------|----------|--|--|--|--|
| Patent - Modifications of RNA leading to increased transc ...                                                                                                                                            | Yes         | Self                                                                                                                                                                                                   |      |          |  |  |  |  |
| <i>Description:</i> Modifications of RNA leading to increased transcript stability and translational efficiency<br><i>Patent Status:</i> Pending<br><i>Filing Jurisdiction:</i> USA<br><i>Licensees:</i> |             | <i>Patent Number:</i> EP1934345B9, DE102005046490.4<br><i>Patent Holder:</i> Current Institution<br><br><i>Additional Information:</i> self and spouse are co-inventors on various patents on RNA Tech |      |          |  |  |  |  |
| <table border="1"> <thead> <tr> <th>Licensee</th> <th>Title</th> <th>Date</th> </tr> </thead> <tbody> <tr> <td>biontech</td> <td></td> <td></td> </tr> </tbody> </table>                                 | Licensee    | Title                                                                                                                                                                                                  | Date | biontech |  |  |  |  |
| Licensee                                                                                                                                                                                                 | Title       | Date                                                                                                                                                                                                   |      |          |  |  |  |  |
| biontech                                                                                                                                                                                                 |             |                                                                                                                                                                                                        |      |          |  |  |  |  |

### Additional Questions:

- Are there other relationships or activities that readers could perceive to have influenced, or that give the appearance of potentially influencing, what you wrote in the submitted work?  
No.
- What is the manuscript title?  
Safety and Immunogenicity of BNT162b2 COVID-19 Vaccine in 5011 Year Old
- Are you the corresponding author?  
No.

### Certification

I certify that the information provided in this disclosure is complete and accurate.



Disclosure Purpose: 21-16298

Summary of Interests

**Company or Organization**

| Entity                                                                                                                                                                                                         | Type             | Interest Held By                                                                |
|----------------------------------------------------------------------------------------------------------------------------------------------------------------------------------------------------------------|------------------|---------------------------------------------------------------------------------|
| <a href="#">Moderna</a>                                                                                                                                                                                        | Grant / Contract | Self                                                                            |
| <i>Recipient Name:</i> Duke University<br><i>Grant / Contract Description:</i> Conduct of Clinical Trial<br><i>Additional Information:</i> Co-investigator for Clinical trial                                  |                  | <i>Recipient Type:</i> Institution<br><i>Grant / Contract Purpose:</i> Research |
| <a href="#">Pfizer</a>                                                                                                                                                                                         | Grant / Contract | Self                                                                            |
| <i>Recipient Name:</i> Duke University<br><i>Grant / Contract Description:</i> Conduct of Pfizer/BioNTech COVID-19 vaccine studies<br><i>Additional Information:</i> Principal investigator for clinical trial |                  | <i>Recipient Type:</i> Institution<br><i>Grant / Contract Purpose:</i> Research |
| <a href="#">Vaxcyte</a>                                                                                                                                                                                        | Other            | Self                                                                            |
| <i>Category:</i> Other<br><i>Additional Information:</i> No financial compensation as of this time                                                                                                             |                  | <i>Description:</i> Scientific Advisory Board                                   |

Additional Questions:

- Are there other relationships or activities that readers could perceive to have influenced, or that give the appearance of potentially influencing, what you wrote in the submitted work?**  
No.
- What is the manuscript title?**  
Safety and Immunogenicity of BNT162b2 COVID-19 Vaccine in 5-11 Year Olds
- Are you the corresponding author?**  
No.

Certification

I certify that the information provided in this disclosure is complete and accurate.

Disclosure Purpose: 21-16298

Summary of Interests

**Company or Organization**

| Entity                                                                           | Type       | Interest Held By                                                                      |
|----------------------------------------------------------------------------------|------------|---------------------------------------------------------------------------------------|
| Pfizer                                                                           | Employment | Self                                                                                  |
| <i>Title:</i> Sr. Director, Vaccine Statistics<br><i>Additional Information:</i> |            | <i>Position Description:</i> Design, conduct, and analysis of vaccine clinical trials |

Additional Questions:

- Are there other relationships or activities that readers could perceive to have influenced, or that give the appearance of potentially influencing, what you wrote in the submitted work?**  
No.
- What is the manuscript title?**  
Safety and Immunogenicity of BNT162b2 COVID-19 Vaccine in 5-11 Year Olds
- Are you the corresponding author?**  
No.

Certification

I certify that the information provided in this disclosure is complete and accurate.



Supplement: NEJMoa2116298_disclosures.pdf [file NEJMoa2116298_disclosures.pdf]
