# Supplementary material
Source: PubMed Central journal article supplement (PMC8609605)
Supplement: NEJMoa2116298_appendix.pdf [file NEJMoa2116298_appendix.pdf]

## Supplementary Appendix

This appendix has been provided by the authors to give readers additional information about their work.

Supplement to: Walter EB, Talaat KR, Sabharwal C, et al. Evaluation of the BNT162b2 Covid-19 vaccine in children 5 to 11 years of age. *N Engl J Med*. DOI: [10.1056/NEJMoa2116298](https://doi.org/10.1056/NEJMoa2116298)

## SUPPLEMENTARY APPENDIX

|                                                                                                                                                 |    |
|-------------------------------------------------------------------------------------------------------------------------------------------------|----|
| List of Investigators .....                                                                                                                     | 2  |
| Inclusion and Exclusion Criteria.....                                                                                                           | 5  |
| Ethical Conduct of the Study .....                                                                                                              | 5  |
| Study Responsibilities.....                                                                                                                     | 5  |
| Phase 1 Review of Safety Data and Stopping Rules.....                                                                                           | 6  |
| Calculation of Immunogenicity Parameters.....                                                                                                   | 6  |
| Determination of COVID-19 and MIS-C .....                                                                                                       | 7  |
| Figure S1. Local reactions (A) and systemic events (B) reported in the phase 1 study in participants 5–11 years old.....                        | 9  |
| Figure S2. Immunogenicity of BNT162b2 at 7 days after dose 2 in the phase 1 study in participants 5–11 years old.....                           | 11 |
| Figure S3. Geometric mean titers and geometric mean fold rises of SARS-CoV-2 neutralizing titers for participants 5–11 and 16–25 years old..... | 12 |
| Table S1. Study populations .....                                                                                                               | 13 |
| Table S2. Demographic characteristics of phase 1 participants 5–11 years old* .....                                                             | 14 |
| Table S3. Demographic characteristics of phase 2/3 participants 5–11 and 16–25 years old* .....                                                 | 15 |
| Table S4. Duration from first to last day of local reactions and systemic events .....                                                          | 16 |
| Table S5. Severity scale for local reactions and systemic events .....                                                                          | 18 |
| Table S6. Phase 1 participants 5–11 years old reporting at least 1 adverse event .....                                                          | 19 |
| Table S7. Phase 2/3 participants 5–11 years old reporting at least 1 adverse event .....                                                        | 20 |

## List of Investigators

| <b>Name</b>                                           | <b>Institute</b>                                                                                                                | <b>Location</b>                      |
|-------------------------------------------------------|---------------------------------------------------------------------------------------------------------------------------------|--------------------------------------|
| Acevedo, Armando                                      | Acevedo Clinical Research Associates                                                                                            | Miami, FL, USA                       |
| Amisola, Rogelio                                      | PriMed Clinical Research                                                                                                        | Dayton, OH, USA                      |
| Anderson, Evan                                        | Emory Children's Center Illness POD<br>Emory University School of Medicine                                                      | Atlanta, GA, USA<br>Atlanta, GA, USA |
| Arimany Montaña,<br>Josep Lluís                       | Hospital Universitari General de Catalunya                                                                                      | Barcelona, Spain                     |
| Arora, Samir                                          | Aventiv Research                                                                                                                | Columbus, OH, USA                    |
| Baca Cots, Manuel                                     | Grupo Pediátrico Uncibay                                                                                                        | Málaga, Spain                        |
| Baker, Jeffrey                                        | Clinical Research Prime                                                                                                         | Idaho Falls, ID, USA                 |
| Barnett, Elizabeth                                    | Boston Medical Center                                                                                                           | Boston, MA, USA                      |
| Benun, Jacques                                        | ARC Clinical Research at Wilson Parke                                                                                           | Austin, TX, USA                      |
| Boppana, Suresh                                       | University of Alabama at Birmingham – School of<br>Medicine Pediatrics                                                          | Birmingham, AL, USA                  |
| Butuk, David                                          | Solaris Clinical Research                                                                                                       | Meridian, ID, USA                    |
| Caserta, Mary                                         | University of Rochester Medical Center                                                                                          | Rochester, NY, USA                   |
| Casey, Janet                                          | Rochester Clinical Research                                                                                                     | Rochester, NY, USA                   |
| Christensen, Shane                                    | J. Lewis Research – Foothill Family Clinic South                                                                                | Salt Lake City, UT, USA              |
| Czajka, Hanna                                         | Centrum Badań Klinicznych JCI                                                                                                   | Krakow, Poland                       |
| Day, James Christopher<br>(replaced Barbara<br>Pahud) | Children's Mercy Hospital                                                                                                       | Kansas City, MO, USA                 |
| De Valle, Oscar                                       | West Houston Clinical Research Service                                                                                          | Houston, TX, USA                     |
| Dever, Michael                                        | Clinical Neuroscience Solutions                                                                                                 | Orlando, FL, USA                     |
| Domachowske, Joseph                                   | State University of New York, Upstate University Hospital<br>– Pediatric and Adolescent Infectious Disease/Immunology<br>Center | Syracuse, NY, USA                    |
| Eder, Frank                                           | Meridian Clinical Research                                                                                                      | Binghamton, NY, USA                  |
| Englund, Janet                                        | Seattle Children's Hospital                                                                                                     | Seattle, WA, USA                     |
| Fergie, Jaime                                         | Driscoll Children's Hospital                                                                                                    | Corpus Christi, TX, USA              |
| Finn, Daniel                                          | Kentucky Pediatric/Adult Research                                                                                               | Bardstown, KY, USA                   |
| Fortuny Guasch,<br>Clàudia                            | Hospital Sant Joan de Déu                                                                                                       | Barcelona, Spain                     |
| Garcia-Diaz, Julia                                    | Ochsner Clinic Foundation                                                                                                       | New Orleans, LA, USA                 |
| Garcia-Sicilia Lopez,<br>Jose                         | Hospital Universitario HM Montepríncipe                                                                                         | Madrid, Spain                        |
| Garza, Homero                                         | Van Tran Family Practice<br>Ventavia Research Group                                                                             | Houston, TX, USA<br>Houston, TX, USA |
| Hartman, Aaron                                        | Virginia Research Center                                                                                                        | Midlothian, VA, USA                  |

---

|                             |                                                                                                    |                                                                    |
|-----------------------------|----------------------------------------------------------------------------------------------------|--------------------------------------------------------------------|
| Heller, Robert              | Bayview Research Group                                                                             | Valley Village, CA, USA                                            |
| Jennings, Timothy           | Clinical Research Professionals                                                                    | Chesterfield, MO, USA                                              |
| Kantele, Anu                | Meilahti Vaccine Research Center (MeVac)                                                           | Helsinki, Finland                                                  |
| Karhusaari, Hanna           | Tampere University/Pori Vaccine Research Clinic                                                    | Pori, Finland                                                      |
| Klein, Nicola               | Kaiser Permanente Northern California                                                              | Oakland, CA, USA<br>Sacramento, CA, USA<br>Santa Clara, CA, USA    |
| Klein, Terry                | Alliance for Multispecialty Research                                                               | Wichita, KS, USA                                                   |
| Kokko, Satu                 | Tampere University/Oulu Vaccine Research Clinic                                                    | Oulu, Finland                                                      |
| Kopinska, Elzbieta          | Nasz Lekarz Ośrodek Badań Klinicznych                                                              | Torun, Poland                                                      |
| Korbal, Piotr               | IN VIVO                                                                                            | Bydgoszcz, Poland                                                  |
| Koski, Susanna              | Tampere University/Helsinki South Vaccine Research Clinic                                          | Helsinki, Finland                                                  |
| Kuchar, Ernest              | Provita Poliklinika                                                                                | Warszawa, Poland                                                   |
| Kulig, Karolina             | Ośrodek Badań Klinicznych AppleTreeClinics                                                         | Lodz, Poland                                                       |
| Laajalahti, Outi            | Tampere University/Seinäjoki Vaccine Research Clinic                                               | Seinäjoki, Finland                                                 |
| Leonard, Daniel             | Meridian Clinical Research                                                                         | Hastings, NE, USA                                                  |
| Li, Simon                   | Rutgers University – Pediatric Research Center                                                     | New Brunswick, NJ, USA                                             |
| Majda-Stanisławska, Ewa     | GRAVITA Diagnostyka i Leczenie Nieplodności                                                        | Lodz, Poland                                                       |
| Maldonado, Yvonne           | Stanford University – Clinical and Translational Research Unit                                     | Palo Alto, CA, USA                                                 |
| Marshall, Gary              | Novak Center for Children’s Health                                                                 | Louisville, KY, USA                                                |
| Martinón Torres, Federico   | Hospital Clínico Universitario de Santiago de Compostela                                           | Santiago de Compostela, Spain                                      |
| Miranda Valdivieso, Mariano | Hospital de Antequera                                                                              | Antequera, Spain                                                   |
| Munoz, Flor M.              | Texas Children’s Hospital, Baylor College of Medicine                                              | Houston, TX, USA                                                   |
| Nachman, Sharon             | Advanced Specialty Care<br>Clinical Research Center<br>Stony Brook University                      | Commack, NY, USA<br>East Setauket, NY, USA<br>Stony Brook, NY, USA |
| Natalini Martínez, Silvina  | Hospital HM Puerta del Sur                                                                         | Móstoles, Spain                                                    |
| Ogbuagu, Onyema             | Yale Center for Clinical Investigation                                                             | New Haven, CT, USA                                                 |
| Ohnmacht, Richard           | Velocity Clinical Research – Providence                                                            | Warwick, RI, USA                                                   |
| Paavola, Pauliina           | Tampere University/Kokkola Vaccine Research Clinic                                                 | Kokkola, Finland                                                   |
| Pajek, Barbara              | Niepubliczny Zakład Lecznictwa Ambulatoryjnego<br>Michalkowice, Jarosz i Partnerzy Spolka Lekarska | Siemianowice Śląskie, Poland                                       |
| Patel, Nehali               | St. Jude Children’s Research Hospital                                                              | Memphis, TN, USA                                                   |
| Paulsen, Grant              | Cincinnati Children’s Hospital Medical Center                                                      | Cincinnati, OH, USA                                                |
| Peltonen, Lauri             | Tampere University/Järvenpää Vaccine Research Center                                               | Järvenpää, Finland                                                 |

---

---

|                                |                                                                                     |                                    |
|--------------------------------|-------------------------------------------------------------------------------------|------------------------------------|
| Peterson, James                | J. Lewis Research – Foothill Family Clinic North                                    | Salt Lake City, UT, USA            |
| Rey, M. Mildred                | Center for Clinical Trials                                                          | Paramount, CA, USA                 |
| Riesenberg, Robert             | Atlanta Center for Medical Research                                                 | Atlanta, GA, USA                   |
| Rojo, Pablo                    | Hospital Universitario 12 de Octubre                                                | Madrid, Spain                      |
| Salamanca de la Cueva, Ignacio | Instituto Hispalense de Pediatría                                                   | Sevilla, Spain                     |
| Senders, Shelly                | Senders Pediatrics                                                                  | South Euclid, OH, USA              |
| Seppa, Ilkka                   | Turku Vaccine Research Clinic                                                       | Turku, Finland                     |
| Sharp, Stephan                 | Clinical Research Associates                                                        | Nashville, TN, USA                 |
| Sher, Lawrence                 | Peninsula Research Associates                                                       | Rolling Hills Estates, CA, USA     |
| Simões, Eric A.F.              | Children’s Hospital Colorado                                                        | Aurora, CO, USA                    |
| Simonsen, Kari                 | Children’s Hospital & Medical Center<br>Children’s Physicians Clinic, Spring Valley | Omaha, NE, USA<br>Omaha, NE, USA   |
| Sipila, Marjaana               | Tampere Vaccine Research Clinic                                                     | Tampere, Finland                   |
| Slade, Lance                   | Meridian Clinical Research                                                          | Macon, GA, USA                     |
| Slechta, Stacy                 | Alliance for Multispecialty Research                                                | Newton, KS, USA                    |
| Stryczyńska-Kazubska, Joanna   | Rodzinne Centrum Medyczne Lubmed                                                    | Luboń, Poland                      |
| Talaat, Kawsar                 | Johns Hopkins University                                                            | Baltimore, MD, USA                 |
| Ukkonen, Benita                | Tampere University/Espoo Vaccine Research Clinic                                    | Espoo, Finland                     |
| Ulied Armiñana, Angels         | EAP Centelles                                                                       | Centelles, Spain                   |
| Vanchiere, John                | Louisiana State University Health Shreveport – Clinical Trials Office               | Shreveport, LA, USA                |
| Walter, Emmanuel               | Clinical Research Pickett Road<br>Duke Human Vaccine Institute                      | Durham, NC, USA<br>Durham, NC, USA |
| Wiedermann, Bernhard           | Children’s National Medical Center                                                  | Washington, DC, USA                |
| Wisman, Paul                   | Pediatric Associates of Charlottesville<br>Pediatric Research of Charlottesville    | Charlottesville, VA, USA           |
| Zomcik, Anne                   | Allegheny Health and Wellness Pavilion                                              | Erie, PA, USA                      |

---

## **Inclusion and Exclusion Criteria**

The study included healthy participants with pre-existing stable disease (ie, disease not requiring a significant change in therapy or hospitalization for worsening disease in the 6 weeks before enrollment). In the phase 1 portion of the study, exclusion criteria included past clinical (based on COVID-19 symptoms/signs alone if a SARS-CoV-2 nucleic acid amplification test [NAAT] result was unavailable) or virologic (based on COVID-19 symptoms/signs and a positive SARS-CoV-2 NAAT result) COVID-19 diagnosis, as well as known HIV or hepatitis C or B virus infection. Exclusion criteria in the phase 1 and 2/3 portions of the study included receipt of COVID-19 preventative treatments, history of multisystem inflammatory syndrome in children (MIS-C) or of severe adverse reaction with a vaccine or any component of the study intervention, and immunodeficiency, autoimmune disease, or conditions associated with prolonged bleeding.

## **Ethical Conduct of the Study**

Conduct of this study was in accordance with the study protocol and with consensus ethical principles derived from international guidelines including the Declaration of Helsinki, Council for International Organizations of Medical Sciences Ethical Guidelines, International Conference on Harmonisation Guidelines for Good Clinical Practice, and applicable laws and regulations, including applicable privacy laws. The study protocol and any amendments, informed consent documents, and other relevant documents were approved by institutional review board/ethics committees (IRB/EC) before study initiation. Before any study activity, written informed consent was obtained from the participants' parents/legal guardians, and affirmative agreement from the participant was subsequently obtained when in the capacity to provide assent, as determined by the IRB/EC.

## **Study Responsibilities**

Pfizer was responsible for study design and conduct; data collection, analysis, and interpretation; and writing of this manuscript. Both Pfizer and BioNTech manufactured the vaccine and placebo. BioNTech was the regulatory sponsor of the study and contributed to data interpretation and writing of the manuscript. All data were available to the authors, who vouch for its accuracy and completeness and to adherence of the study to the protocol.

## **Phase 1 Review of Safety Data and Stopping Rules**

An Internal Review Committee (IRC) reviewed safety and immunogenicity data to permit dose level finding in each age group, and to select the dose level to proceed to phase 2/3. Data supporting these selections included safety, binding antibody levels, and neutralizing titers.

Stopping rules were applied to all phase 1 participants based on review of adverse event (AE) and reactogenicity data, until the start of phase 2/3 or 30 days after the last vaccine dose in phase 1. These data were continuously monitored by the investigators and sponsor to allow prompt identification of any event contributing to the stopping rule.

The stopping rule criteria for each BNT162b2 dose level included: (1) if a participant developed a serious AE as assessed by the investigator as possibly related to the vaccine and for which there was no alternative, plausible, or attributable cause; (2) if a participant developed a grade 4 local reaction or systemic event; (3) if any participant developed a fever  $>40^{\circ}\text{C}$  for  $\geq 1$  daily measurement after vaccination; (4) if 2 participants within the same age group reported the same or similar severe AEs after vaccination as assessed by the investigator as possibly related to the vaccine and for which there was no alternative, plausible, or attributable cause; and (5) if any participant died or required intensive care unit admission because of SARS-CoV-2 infection.

If a stopping rule was met, the IRC was to consider all data; randomization and vaccine administration for all dose levels in the affected age group were to be paused; and the Data Monitoring Committee was to review all appropriate data. All other routine study conduct activities were to continue for all vaccinated participants.

## **Calculation of Immunogenicity Parameters**

The geometric mean titers (GMTs) were derived by exponentiating the mean, and geometric mean ratios were derived by exponentiating the mean of the differences (5–11-year-olds minus 16–25-year-olds), in logarithmically transformed neutralizing titer values. Associated 2-sided 95% CIs were based on the Student  $t$  distribution and then exponentiating results. Geometric mean fold rises (GMFRs) were calculated for participants with non-missing values both before and after each vaccination by exponentiating the mean of the difference of logarithmically transformed assay results. Associated 2-sided 95% CIs were obtained using the Student  $t$  distribution for the mean difference and exponentiating the confidence limits.

## Determination of COVID-19 and MIS-C

Surveillance for potential cases of COVID-19 and MIS-C will occur throughout a participant's involvement in the study. If a participant developed an acute illness, the participant was considered to potentially have COVID-19 illness. In this circumstance, assessments were to include nasal (anterior nares) swab sample collection, which were tested at a central laboratory using the reverse transcription–polymerase chain reaction (RT-PCR) test (Cepheid) or other equivalent nucleic acid amplification–based test (NAAT), to detect SARS-CoV-2. In addition, clinical information and results from local standard-of-care tests were assessed. The central laboratory NAAT result was used for the case definition. If no result was available from the central laboratory, a local NAAT result could be used if it was obtained using either the Cepheid Xpert Xpress SARS-CoV-2, Roche Cobas SARS-CoV-2 Real-Time RT-PCR test, or the Abbott Molecular/RealTime SARS-CoV-2 assay.

SARS-CoV-2–related cases, and SARS-CoV-2–related severe cases were documented (for both, the onset date of the case was the date that symptoms were first experienced by the participant; if new symptoms were reported within 4 days after resolution of all previous symptoms, they were considered as part of a single illness). The definition of confirmed COVID-19 included the presence of  $\geq 1$  symptom (ie, fever, new or increased cough, new or increased shortness of breath, chills, new or increased muscle pain, new loss of taste or smell, sore throat, diarrhea [ $\geq 3$  stools per day], vomiting) and being SARS-CoV-2 NAAT-positive during, or within 4 days before or after, the symptomatic period (either at the central laboratory or at a local testing facility using an acceptable test).

Diagnosis of severe COVID-19 included confirmed COVID-19 and the presence of  $\geq 1$  of the following:

- (1) clinical signs at rest indicative of severe systemic illness (eg, respiratory rate and heart rate as shown in the following table,  $\text{SpO}_2 \leq 92\%$  on room air or  $>50\%$   $\text{FiO}_2$  to maintain  $\geq 92\%$ , or  $\text{PaO}_2/\text{FiO}_2 < 300$  mmHg)

| Participant age | Respiratory rate | Heart rate |
|-----------------|------------------|------------|
| 4–6 years       | $>29$            | $>131$     |
| 6–<8 years      | $>27$            | $>123$     |
| 8–<12 years     | $>25$            | $>115$     |

- (2) respiratory failure (ie, needing high-flow oxygen, including continuous positive airway pressure, bilevel positive airway pressure, noninvasive ventilation, mechanical ventilation, or extracorporeal membrane oxygenation)
- (3) evidence of shock or cardiac failure (ie, systemic blood pressure  $<70 + (\text{age in years} \times 2)$  for age up to 10 years,  $<90$  for age  $\geq 10$  years; or requiring vasoactive drugs to maintain blood pressure in the normal range)



- (4) significant acute renal failure (ie, serum creatinine  $\geq 2 \times$  upper limit of normal [ULN] for age or 2-fold increase in baseline creatinine)
- (5) significant gastrointestinal/hepatic failure (ie, total bilirubin  $\geq 4$  mg/dL or ALT  $2 \times$  ULN for age)
- (6) significant neurological dysfunction (ie, Glasgow Coma Scale score  $\leq 11$  or acute change in mental status with a decrease in Glasgow Coma Scale score  $\geq 3$  points from abnormal baseline)
- (7) intensive care unit admission
- (8) death

Confirmed MIS-C was per the CDC MIS-C case definition ([www.cdc.gov/mis-c/hcp/](http://www.cdc.gov/mis-c/hcp/)).

**Figure S1. Local reactions (A) and systemic events (B) reported in the phase 1 study in participants 5–11 years old**

Local reactions and systemic events were assessed within 7 days after administration of BNT162b2 at a 10- $\mu$ g, 20- $\mu$ g, or 30- $\mu$ g dose level. Of 16 participants who received 30  $\mu$ g BNT162b2 at dose 1, 4 received 30  $\mu$ g BNT162b2 at dose 2, and 12 received 10  $\mu$ g BNT162b2 at dose 2. Severity scales for reactogenicity events are summarized in **Table S5**. Fever categories are designated in the key. The numbers above the bars show the number of participants in each group with the specified local reaction or systemic event. Error bars are the 95% CIs.

10  $\mu$ g=10  $\mu$ g BNT162b2; 20  $\mu$ g=20  $\mu$ g BNT162b2; 30/30  $\mu$ g=BNT162b2 administered at a 30- $\mu$ g dose level at dose 1 and dose 2; 30/10  $\mu$ g=BNT162b2 administered at a 30- $\mu$ g dose level at dose 1 and at a 10- $\mu$ g dose level at dose 2.

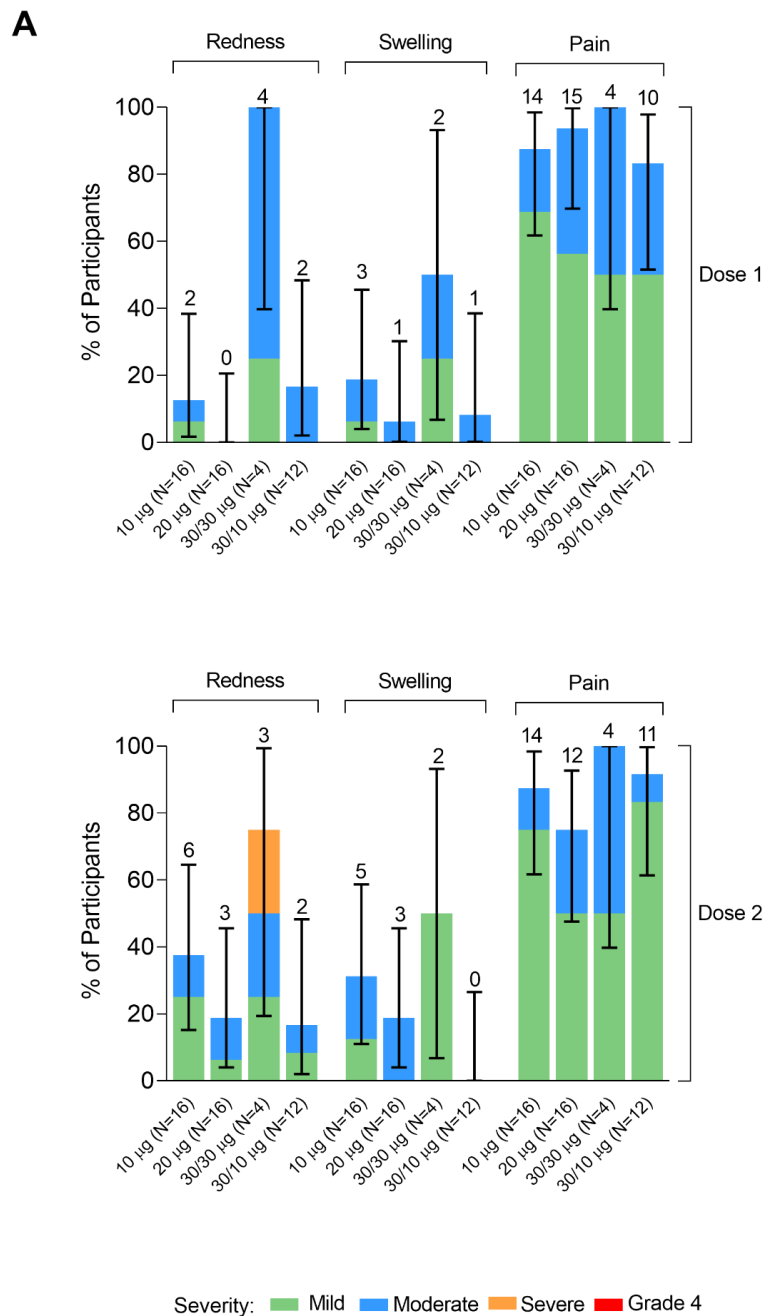

**B**

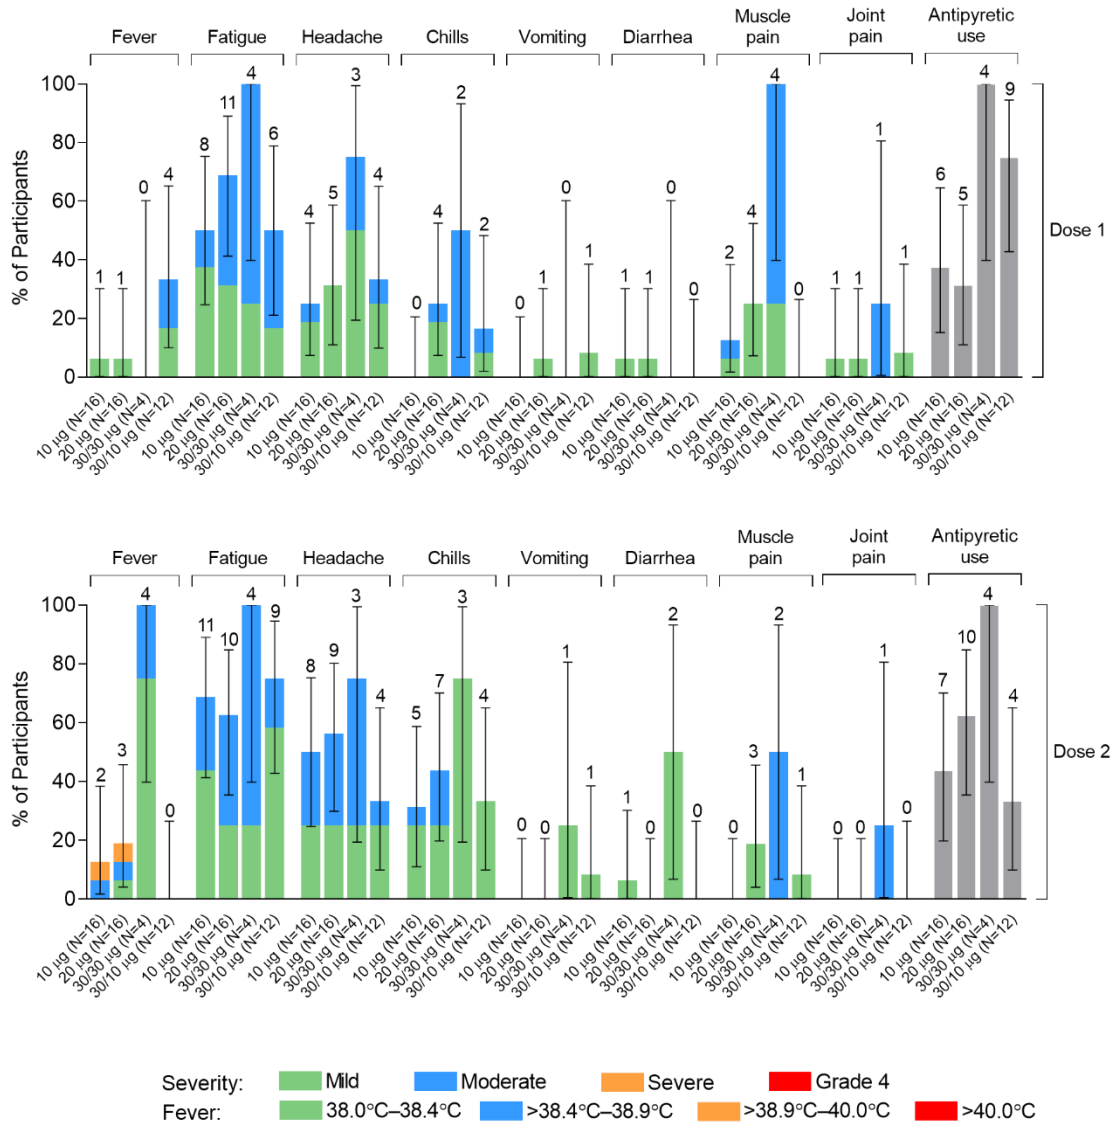

### Figure S2. Immunogenicity of BNT162b2 at 7 days after dose 2 in the phase 1 study in participants 5–11 years old

Results are for participants in the evaluable immunogenicity population (**Table S1**) who had no serological or virological evidence of SARS-CoV-2 infection (before the 7-day post-dose 2 blood collection) and no medical history of COVID-19. Dots represent individual titers. GMTs and 2-sided 95% CIs were calculated by exponentiating the mean logarithm of the titers and the corresponding CIs (based on the Student *t* distribution). No assay results were below the lower limit of quantitation.

GMT=geometric mean titer; SARS-CoV-2=severe acute respiratory syndrome coronavirus 2.

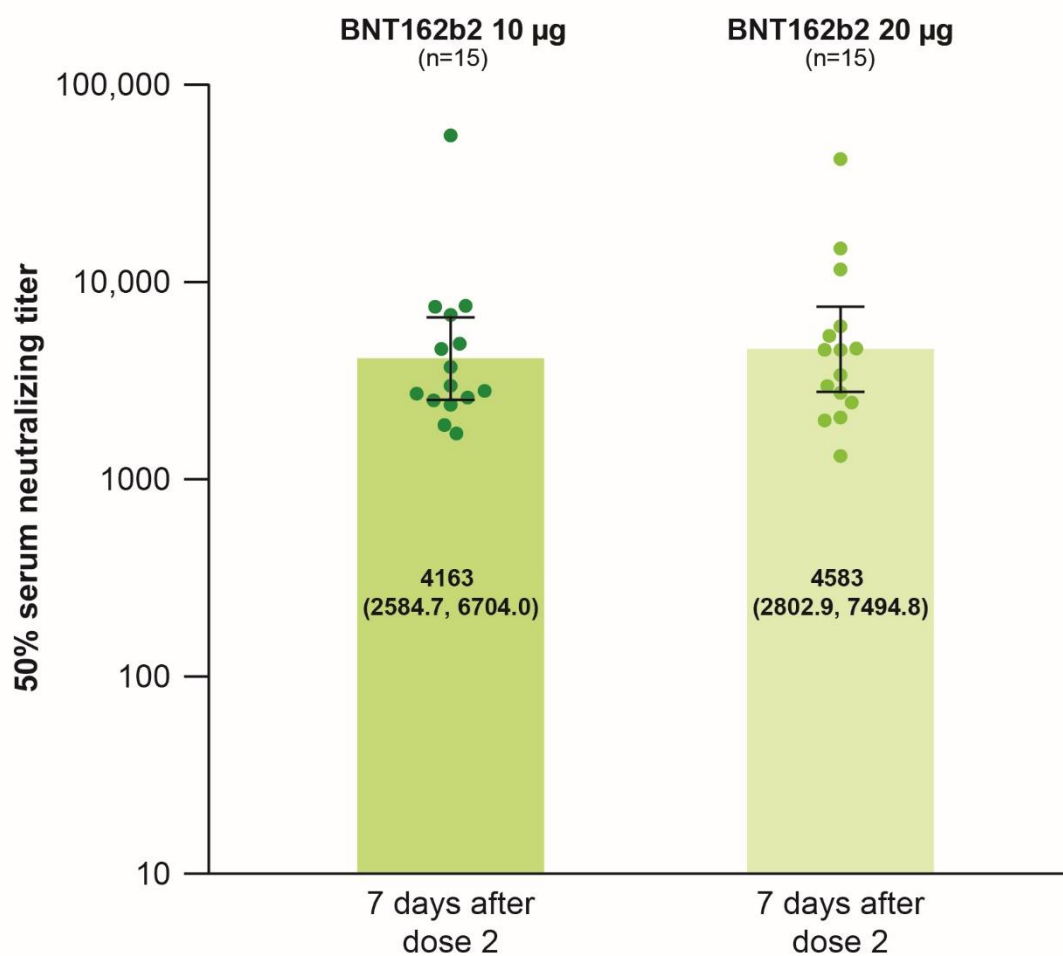

**Figure S3. Geometric mean titers and geometric mean fold rises of SARS-CoV-2 neutralizing titers for participants 5–11 and 16–25 years old**

Results are for participants in the immunobridging subset of the evaluable immunogenicity population (Table S1) who had no serological or virological evidence of SARS-CoV-2 infection before the 1-month post-dose 2 blood sample collection, and who had no COVID-19 medical history. GMTs, GMFRs, and 2-sided 95% CIs were calculated by exponentiating the mean logarithm of the titers or fold rises and the corresponding CIs (based on the Student *t* distribution). Assay results below the LLOQ were set to  $0.5 \times$  LLOQ.

GMFR=geometric mean fold rise; GMT=geometric mean titer; LLOQ=lower limit of quantitation; SARS-CoV-2=severe acute respiratory syndrome coronavirus 2.

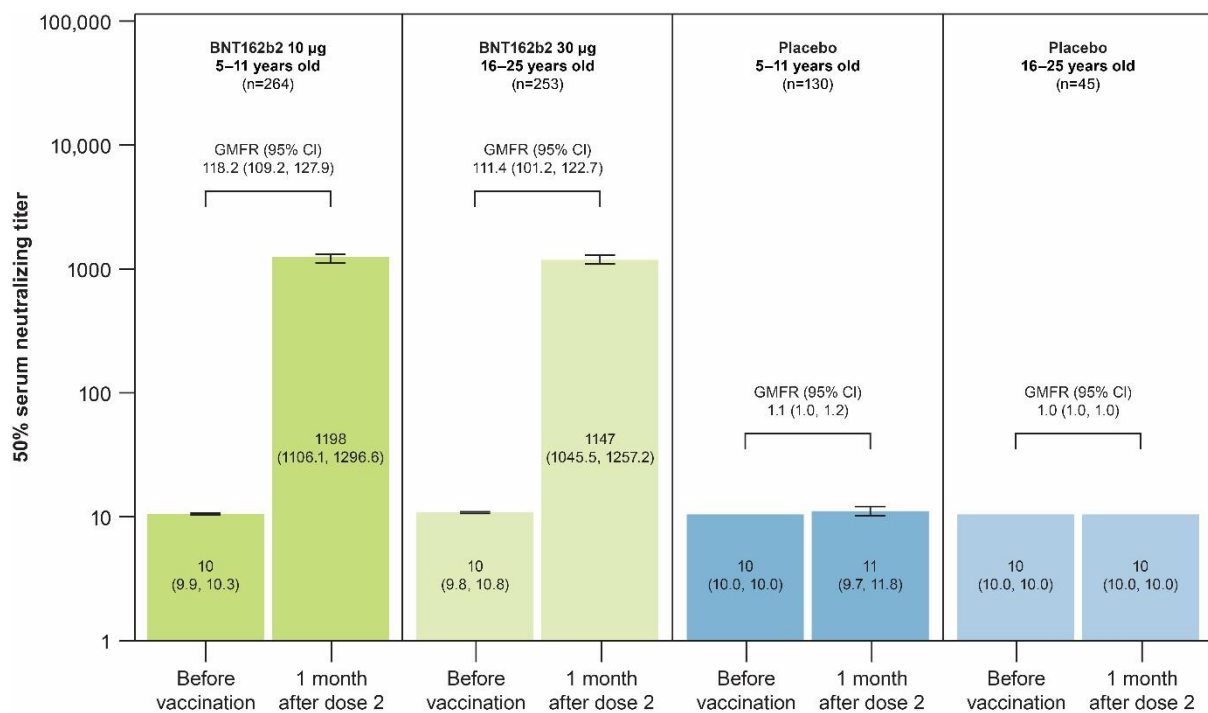

**Table S1. Study populations**

| <b>Population</b>            | <b>Description</b>                                                                                                                                                                                                                                                                                                                                  |
|------------------------------|-----------------------------------------------------------------------------------------------------------------------------------------------------------------------------------------------------------------------------------------------------------------------------------------------------------------------------------------------------|
| Enrolled                     | All participants who provided informed consent                                                                                                                                                                                                                                                                                                      |
| Randomized                   | All participants who were assigned a randomization number                                                                                                                                                                                                                                                                                           |
| Immunobridging subset        | A subset of participants 5–11 years old from this study (approximately the first 6 participants from every site) and randomly selected participants 16–25 years old from the ongoing pivotal study selected for immunogenicity analyses.                                                                                                            |
| Evaluable immunogenicity     | All eligible randomized participants who received 2 vaccine doses to which they were randomized (with dose 2 received within the predefined window), had $\geq 1$ valid and determinate immunogenicity result from the blood sample collected within an appropriate window, and had no important protocol deviations as determined by the clinician |
| All-available immunogenicity | All randomized participants who received $\geq 1$ dose of the study intervention and had $\geq 1$ valid and determinate immunogenicity result after vaccination                                                                                                                                                                                     |
| Safety                       | All randomized participants who received $\geq 1$ dose of the study intervention                                                                                                                                                                                                                                                                    |
| Evaluable efficacy           | All eligible randomized participants who received 2 vaccine doses to which they were randomized within the predefined window, and who had no other important protocol deviations as determined by the investigator                                                                                                                                  |
| All-available efficacy       | Dose 1: all randomized participants who received at least 1 dose<br>Dose 2: all randomized participants who received both doses                                                                                                                                                                                                                     |

**Table S2. Demographic characteristics of phase 1 participants 5–11 years old\***

| <b>Characteristic</b>                         | <b>BNT162b2<br/>10 µg<br/>(N=16)</b> | <b>BNT162b2<br/>20 µg<br/>(N=16)</b> | <b>BNT162b2<br/>30/30 µg†<br/>(N=4)</b> | <b>BNT162b2<br/>30/10 µg†<br/>(N=12)</b> | <b>Total<br/>(N=48)</b> |
|-----------------------------------------------|--------------------------------------|--------------------------------------|-----------------------------------------|------------------------------------------|-------------------------|
| Male, n (%)                                   | 5 (31.3)                             | 10 (62.5)                            | 3 (75.0)                                | 6 (50.0)                                 | 24 (50.0)               |
| Race, n (%)‡                                  |                                      |                                      |                                         |                                          |                         |
| White                                         | 11 (68.8)                            | 13 (81.3)                            | 4 (100.0)                               | 10 (83.3)                                | 38 (79.2)               |
| Black or African American                     | 3 (18.8)                             | 0                                    | 0                                       | 0                                        | 3 (6.3)                 |
| Asian                                         | 2 (12.5)                             | 2 (12.5)                             | 0                                       | 1 (8.3)                                  | 5 (10.4)                |
| Multiracial, American Indian or Alaska Native | 0                                    | 1 (6.3)                              | 0                                       | 1 (8.3)                                  | 2 (4.2)                 |
| Ethnicity, n (%)‡                             |                                      |                                      |                                         |                                          |                         |
| Hispanic/Latinx                               | 2 (12.5)                             | 0                                    | 2 (50.0)                                | 0                                        | 4 (8.3)                 |
| Non-Hispanic/non-Latinx                       | 14 (87.5)                            | 16 (100.0)                           | 2 (50.0)                                | 12 (100.0)                               | 44 (91.7)               |
| Age, years                                    |                                      |                                      |                                         |                                          |                         |
| Mean, ± standard deviation                    | 7.9±1.89                             | 8.0±1.97                             | 6.8±2.36                                | 8.3±1.76                                 | 7.9±1.90                |
| Median (range)                                | 8.5 (5–11)                           | 8.5 (5–10)                           | 6.0 (5–10)                              | 8.5 (5–10)                               | 8.0 (5–11)              |
| Country, n (%)                                |                                      |                                      |                                         |                                          |                         |
| United States                                 | 16 (100.0)                           | 16 (100.0)                           | 4 (100.0)                               | 12 (100.0)                               | 48 (100.0)              |

\* Results are for the safety population (**Table S1**).

† Of 16 participants who received 30 µg at dose 1, 4 received 30 µg at dose 2 and 12 received 10 µg at dose 2.

Percentages may not total 100 because of rounding.

‡ Race and ethnic group were reported by the participants or their parents/guardians.

**Table S3. Demographic characteristics of phase 2/3 participants 5–11 and 16–25 years old\***

| Characteristic               | BNT162b2                           |                                      | Placebo                   |                            |
|------------------------------|------------------------------------|--------------------------------------|---------------------------|----------------------------|
|                              | 10 µg<br>5–11 years old<br>(N=311) | 30 µg<br>16–25 years old†<br>(N=286) | 5–11 years old<br>(N=156) | 16–25 years old‡<br>(N=49) |
| Male, n (%)                  | 161 (51.8)                         | 141 (49.3)                           | 89 (57.1)                 | 18 (36.7)                  |
| Race, n (%)§                 |                                    |                                      |                           |                            |
| White                        | 247 (79.4)                         | 217 (75.9)                           | 127 (81.4)                | 31 (63.3)                  |
| Black or African American    | 20 (6.4)                           | 33 (11.5)                            | 6 (3.8)                   | 12 (24.5)                  |
| Asian                        | 23 (7.4)                           | 17 (5.9)                             | 15 (9.6)                  | 3 (6.1)                    |
| Multiracial                  | 17 (5.5)                           | 12 (4.2)                             | 6 (3.8)                   | 1 (2.0)                    |
| Other/not reported           | 4 (1.3)                            | 7 (2.4)                              | 2 (1.3)                   | 2 (4.1)                    |
| Ethnicity, n (%)§            |                                    |                                      |                           |                            |
| Hispanic/Latinx              | 55 (17.7)                          | 102 (35.7)                           | 27 (17.3)                 | 14 (28.6)                  |
| Age at vaccination, years    |                                    |                                      |                           |                            |
| Mean, ± standard deviation   | 8.3±1.88                           | 20.9±3.03                            | 8.2±2.06                  | 20.8±3.05                  |
| Median (range)               | 8.0 (5–11)                         | 21.0 (16–25)                         | 9.0 (5–11)                | 22.0 (16–25)               |
| Obese, n (%)§                | 30 (9.6)                           | 48 (16.8)                            | 20 (12.8)                 | 15 (30.6)                  |
| Baseline SARS-CoV-2 status** |                                    |                                      |                           |                            |
| Positive                     | 24 (7.7)                           | 14 (4.9)                             | 14 (9.0)                  | 1 (2.0)                    |
| Negative                     | 287 (92.3)                         | 271 (94.8)                           | 142 (91.0)                | 48 (98.0)                  |
| Missing                      | 0                                  | 1 (0.3)                              | 0                         | 0                          |

\* Results are for the all-available immunogenicity population of the immunobridging subset (**Table S1**).

† Randomly selected from participants in all countries in the ongoing pivotal trial.

‡ Race and ethnic group were reported by the participants or their parents/guardians.

§ Body mass index ≥95th percentile according to the growth chart

([https://www.cdc.gov/growthcharts/html\\_charts/bmiagerev.htm](https://www.cdc.gov/growthcharts/html_charts/bmiagerev.htm)) for 5–11-year-olds, or ≥30 kg/m<sup>2</sup> for 16–25-year-olds.

\*\* A positive severe acute respiratory syndrome coronavirus 2 (SARS-CoV-2) status required a positive N-binding antibody result at vaccination visit 1, a positive nucleic acid amplification test result at vaccination visit 1, or a medical history of coronavirus disease 2019.



**Table S4. Duration from first to last day of local reactions and systemic events**

| <b>Phase 1</b>                                      |                           |                           |                               |                               |
|-----------------------------------------------------|---------------------------|---------------------------|-------------------------------|-------------------------------|
| <b>Local reaction or systemic event</b>             | <b>BNT162b2<br/>10 µg</b> | <b>BNT162b2<br/>20 µg</b> | <b>BNT162b2<br/>30/30 µg*</b> | <b>BNT162b2<br/>30/10 µg*</b> |
| <b>Dose 1, median (range), days [n]</b>             |                           |                           |                               |                               |
| Redness                                             | 3.5 (2, 5) [2]            | NE [0]                    | 2.0 (1, 4) [4]                | 3.5 (3, 4) [2]                |
| Swelling                                            | 1.0 (1, 1) [3]            | 1.0 (1, 1) [1]            | 1.0 (1, 1) [2]                | 2.0 (2, 2) [1]                |
| Injection site pain                                 | 2.0 (1, 5) [14]           | 2.0 (1, 6) [15]           | 3.0 (2, 5) [4]                | 2.0 (1, 5) [10]               |
| Fever                                               | 1.0 (1, 1) [1]            | 1.0 (1, 1) [1]            | NE [0]                        | 1.0 (1, 1) [4]                |
| Fatigue                                             | 2.0 (1, 6) [8]            | 2.0 (1, 6) [11]           | 1.0 (1, 5) [4]                | 1.5 (1, 3) [6]                |
| Headache                                            | 1.5 (1, 5) [4]            | 2.0 (1, 5) [5]            | 2.0 (2, 5) [3]                | 1.0 (1, 1) [4]                |
| Chills                                              | NE [0]                    | 1.0 (1, 5) [4]            | 2.5 (1, 4) [2]                | 1.0 (1, 1) [2]                |
| Vomiting                                            | NE [0]                    | 1.0 (1, 1) [1]            | NE [0]                        | 1.0 (1, 1) [1]                |
| Diarrhea                                            | 1.0 (1, 1) [1]            | 1.0 (1, 1) [1]            | NE [0]                        | NE [0]                        |
| Muscle pain                                         | 1.5 (1, 2) [2]            | 1.0 (1, 3) [4]            | 1.0 (1, 4) [4]                | NE [0]                        |
| Joint pain                                          | 1.0 (1, 1) [1]            | 1.0 (1, 1) [1]            | 3.0 (3, 3) [1]                | 1.0 (1, 1) [1]                |
| <b>Dose 2, median (range), days [n]</b>             |                           |                           |                               |                               |
| Redness                                             | 1.0 (1, 2) [6]            | 1.0 (1, 1) [3]            | 3.0 (2, 3) [3]                | 1.0 (1, 1) [2]                |
| Swelling                                            | 2.0 (1, 3) [5]            | 1.0 (1, 5) [3]            | 1.0 (1, 1) [2]                | NE [0]                        |
| Injection site pain                                 | 2.0 (1, 5) [14]           | 2.0 (1, 6) [12]           | 2.5 (2, 4) [4]                | 2.0 (1, 3) [11]               |
| Fever                                               | 1.0 (1, 1) [2]            | 1.0 (1, 1) [3]            | 1.0 (1, 1) [4]                | NE [0]                        |
| Fatigue                                             | 1.0 (1, 6) [11]           | 1.0 (1, 5) [10]           | 1.0 (1, 9) [4]                | 1.0 (1, 4) [9]                |
| Headache                                            | 1.0 (1, 5) [8]            | 2.0 (1, 6) [9]            | 1.0 (1, 4) [3]                | 1.0 (1, 1) [4]                |
| Chills                                              | 1.0 (1, 4) [5]            | 1.0 (1, 3) [7]            | 1.0 (1, 2) [3]                | 1.0 (1, 1) [4]                |
| Vomiting                                            | NE [0]                    | NE [0]                    | 1.0 (1, 1) [1]                | 1.0 (1, 1) [1]                |
| Diarrhea                                            | 1.0 (1, 1) [1]            | NE [0]                    | 1.0 (1, 1) [2]                | NE [0]                        |
| Muscle pain                                         | NE [0]                    | 1.0 (1, 6) [3]            | 5.0 (1, 9) [2]                | 1.0 (1, 1) [1]                |
| Joint pain                                          | NE [0]                    | NE [0]                    | 9.0 (9, 9) [1]                | NE [0]                        |
| <b>Phase 2/3</b>                                    |                           |                           |                               |                               |
| <b>Dose 1, median (range), days [n<sup>†</sup>]</b> | <b>BNT162b2 10 µg</b>     |                           | <b>Placebo</b>                |                               |
| Redness                                             | 1.0 (1, 8) [176]          |                           | 1.0 (1, 10) [89]              |                               |
| Swelling                                            | 1.0 (1, 9) [125]          |                           | 1.0 (1, 6) [53]               |                               |
| Injection site pain                                 | 2.0 (1, 10) [915]         |                           | 2.0 (1, 10) [437]             |                               |
| Fever                                               | 1.0 (1, 3) [29]           |                           | 1.0 (1, 3) [19]               |                               |
| Fatigue                                             | 1.0 (1, 21) [501]         |                           | 1.0 (1, 10) [241]             |                               |
| Headache                                            | 1.0 (1, 22) [359]         |                           | 1.0 (1, 19) [160]             |                               |
| Chills                                              | 1.0 (1, 9) [77]           |                           | 1.0 (1, 10) [28]              |                               |
| Vomiting                                            | 1.0 (1, 3) [26]           |                           | 1.0 (1, 5) [18]               |                               |
| Diarrhea                                            | 1.0 (1, 6) [85]           |                           | 1.0 (1, 8) [35]               |                               |
| Muscle pain                                         | 1.0 (1, 8) [133]          |                           | 1.0 (1, 9) [55]               |                               |
| Joint pain                                          | 1.0 (1, 7) [60]           |                           | 1.0 (1, 5) [31]               |                               |

| <b>Dose 2, median (range), days [n<sup>†</sup>]</b> |                   |                   |
|-----------------------------------------------------|-------------------|-------------------|
| Redness                                             | 2.0 (1, 11) [211] | 1.0 (1, 8) [105]  |
| Swelling                                            | 2.0 (1, 12) [164] | 2.0 (1, 8) [83]   |
| Injection site pain                                 | 2.0 (1, 12) [849] | 2.0 (1, 9) [431]  |
| Fever                                               | 1.0 (1, 5) [79]   | 1.0 (1, 3) [28]   |
| Fatigue                                             | 1.0 (1, 12) [527] | 1.0 (1, 14) [243] |
| Headache                                            | 1.0 (1, 51) [379] | 1.0 (1, 9) [179]  |
| Chills                                              | 1.0 (1, 8) [131]  | 1.0 (1, 8) [48]   |
| Vomiting                                            | 1.0 (1, 5) [17]   | 1.0 (1, 2) [17]   |
| Diarrhea                                            | 1.0 (1, 28) [88]  | 1.0 (1, 9) [26]   |
| Muscle pain                                         | 1.0 (1, 9) [155]  | 1.0 (1, 8) [75]   |
| Joint pain                                          | 1.0 (1, 7) [73]   | 1.0 (1, 18) [33]  |

n=number of participants reporting the specified reaction or event on any of the 7 days after dose 1 or dose 2;

NE=not estimable.

Results are for the safety population (**Table S1**).

Duration was calculated in days as the difference from the start of the first reported reaction or event to the resolution of the last reported reaction or event, inclusive. For symptoms that were ongoing at the time of the next dose, the stop date was computed as the next dose date. Reactions and events were recorded in the electronic diary and unscheduled clinical assessments from Day 1 through Day 7 after each dose. The resolution date for reactions lasting longer than 7 days was recorded on the participant's case report form.

\* Of 16 participants who received 30 µg at dose 1, 4 received 30 µg at dose 2 and 12 received 10 µg at dose 2.

† Includes participants with reactions or events of unknown duration.

**Table S5. Severity scale for local reactions and systemic events**

|                       | <b>Mild</b>                       | <b>Moderate</b>                     | <b>Severe</b>                   | <b>Grade 4</b>                        |
|-----------------------|-----------------------------------|-------------------------------------|---------------------------------|---------------------------------------|
| <b>Local reaction</b> |                                   |                                     |                                 |                                       |
| Pain                  | Does not interfere with activity  | Interferes with activity            | Prevents daily activity         | ER visit or hospitalization           |
| Redness               | 1–4 caliper units<br>(0.5–2.0 cm) | 5–14 caliper units<br>(>2.0–7.0 cm) | >14 caliper units<br>(>7.0 cm)  | Necrosis or exfoliative<br>dermatitis |
| Swelling              | 1–4 caliper units<br>(0.5–2.0 cm) | 5–14 caliper units<br>(>2.0–7.0 cm) | >14 caliper units<br>(>7.0 cm)  | Necrosis                              |
| <b>Systemic event</b> |                                   |                                     |                                 |                                       |
| Vomiting              | 1–2 times/24 hours                | >2 times/24 hours                   | Requiring IV hydration          | ER visit or hospitalization           |
| Diarrhea              | 2–3 loose stools/24 hours         | 4–5 loose stools/24 hours           | ≥6 loose stools/24 hours        | ER visit or hospitalization           |
| Headache              | Does not interfere with activity  | Some interference with activity     | Prevents daily routine activity | ER visit or hospitalization           |
| Fatigue               | Does not interfere with activity  | Some interference with activity     | Prevents daily routine activity | ER visit or hospitalization           |
| Chills                | Does not interfere with activity  | Some interference with activity     | Prevents daily routine activity | ER visit or hospitalization           |
| Muscle pain           | Does not interfere with activity  | Some interference with activity     | Prevents daily routine activity | ER visit or hospitalization           |
| Joint pain            | Does not interfere with activity  | Some interference with activity     | Prevents daily routine activity | ER visit or hospitalization           |

ER=emergency room; IV=intravenous.

For the fever scale, refer to the legend and scale of **Figure 2B** and **Figure S1B**.

**Table S6. Phase 1 participants 5–11 years old reporting at least 1 adverse event**

|                                                                                | <b>BNT162b2<br/>10 µg<br/>(N†=16)<br/>n‡ (%)</b> | <b>BNT162b2<br/>20 µg<br/>(N†=16)<br/>n‡ (%)</b> | <b>BNT162b2<br/>30/30 µg*<br/>(N†=4)<br/>n‡ (%)</b> | <b>BNT162b2<br/>30/10 µg*<br/>(N†=12)<br/>n‡ (%)</b> |
|--------------------------------------------------------------------------------|--------------------------------------------------|--------------------------------------------------|-----------------------------------------------------|------------------------------------------------------|
| <b>Adverse event</b>                                                           |                                                  |                                                  |                                                     |                                                      |
| Any event (from dose 1 to 1 month after dose 2)                                | 7 (43.8)                                         | 5 (31.3)                                         | 2 (50.0)                                            | 3 (25.0)                                             |
| Related§                                                                       | 4 (25.0)                                         | 2 (12.5)                                         | 2 (50.0)                                            | 3 (25.0)                                             |
| Severe                                                                         | 0                                                | 1 (6.3)                                          | 0                                                   | 0                                                    |
| Life-threatening                                                               | 0                                                | 0                                                | 0                                                   | 0                                                    |
| Any serious adverse event (from dose 1 through data cutoff)                    | 0                                                | 0                                                | 0                                                   | 0                                                    |
| Any adverse event leading to discontinuation (from dose 1 through data cutoff) | 0                                                | 0                                                | 0                                                   | 0                                                    |
| Death (from dose 1 through data cutoff)                                        | 0                                                | 0                                                | 0                                                   | 0                                                    |

Results are for the safety population (**Table S1**).

The data cutoff date was July 16, 2021.

\* Of 16 participants who received 30 µg at dose 1, 4 received 30 µg at dose 2 and 12 received 10 µg at dose 2.

† Number of participants in the specified group. This value is the denominator for the percentage calculations.

‡ Number of participants reporting  $\geq 1$  occurrence of the specified event category. For ‘any event’, n=the number of participants reporting  $\geq 1$  occurrence of any event.

§ Assessed by the investigator as related to the investigational product.

**Table S7. Phase 2/3 participants 5–11 years old reporting at least 1 adverse event**

| <b>Adverse event</b>                                                           | <b>BNT162b2 10 µg<br/>(N*=1518)<br/>n† (%)</b> | <b>Placebo<br/>(N*=750)<br/>n† (%)</b> |
|--------------------------------------------------------------------------------|------------------------------------------------|----------------------------------------|
| Any adverse event (from dose 1 to 1 month after dose 2)                        | 166 (10.9)                                     | 69 (9.2)                               |
| Related‡                                                                       | 46 (3.0)                                       | 16 (2.1)                               |
| Severe                                                                         | 2 (0.1)                                        | 1 (0.1)                                |
| Life-threatening                                                               | 0                                              | 0                                      |
| Any serious adverse event (from dose 1 through data cutoff)                    | 1 (0.1)                                        | 1 (0.1)                                |
| Related‡                                                                       | 0                                              | 0                                      |
| Severe                                                                         | 1 (0.1)                                        | 1 (0.1)                                |
| Life-threatening                                                               | 0                                              | 0                                      |
| Any adverse event leading to discontinuation (from dose 1 through data cutoff) | 0                                              | 0                                      |
| Death (from dose 1 through data cutoff)                                        | 0                                              | 0                                      |

Results are for the safety population (**Table S1**).

The data cutoff date was September 6, 2021.

\* Number of participants in the specified group. This value is the denominator for the percentage calculations.

† Number of participants reporting  $\geq 1$  occurrence of the specified event category. For ‘any event’, n=the number of participants reporting  $\geq 1$  occurrence of any event.

‡ Assessed by the investigator as related to the investigational product.
